# Supplementary material for: Human-Mediated Admixture and Selection Shape the Diversity on the Modern Swine (Sus scrofa) Y Chromosomes
Source: PubMed Central journal article supplement — Mol Biol Evol. 2021 Aug 3;38(11):5051–65. doi: 10.1093/molbev/msab230 (PMC8557463; doi:10.1093/molbev/msab230), 2021-08-03
Supplement: msab230_supplementary_data.pdf [file msab230_supplementary_data.pdf]

1  
2  
3  
4  
5  
6  
7  
8  
9  
10  
11  
12  
13  
14  
15  
16  
17  
18  
19  
20  
21  
22  
23  
24  
25

**Supplementary Information**

**Human-mediated admixture and selection shape the diversity on the  
modern swine (*Sus scrofa*) Y chromosomes**

26

## Table of Contents

|    |                                                                                                    |           |
|----|----------------------------------------------------------------------------------------------------|-----------|
| 27 | <b>1. Supplementary Notes .....</b>                                                                | <b>4</b>  |
| 28 | Note S1. The quality of SNP calling .....                                                          | 4         |
| 29 | Note S2. The coverage of the Y chromosome .....                                                    | 5         |
| 30 | Note S3. South Chinese pigs contribute to the development of modern European breeds .....          | 8         |
| 31 | Note S4. Nucleotide diversity in the Y chromosome haplogroups.....                                 | 9         |
| 32 | Note S5. Sex-biased effect may partially contribute to low nucleotide diversity in the MSY region. |           |
| 33 | .....                                                                                              | 10        |
| 34 | Note S6. The divergence time of the MSY haplotypes .....                                           | 11        |
| 35 | Note S7. Introduction to the heterogeneous stock construction .....                                | 12        |
| 36 | <b>2. Supplementary Methods.....</b>                                                               | <b>12</b> |
| 37 | Samples and genome sequencing .....                                                                | 12        |
| 38 | SNP calling .....                                                                                  | 13        |
| 39 | Population genetic analysis using autosomal data.....                                              | 15        |
| 40 | Evolutionary history analysis using Y chromosome data.....                                         | 16        |
| 41 | <b>3. Supplementary Tables.....</b>                                                                | <b>18</b> |
| 42 | Supplementary Table S1. Samples Information. ....                                                  | 18        |
| 43 | Supplementary Table S2. Sequencing Statistics of 205 samples.....                                  | 20        |
| 44 | Supplementary Table S3. SNPs statistics of 200 Eurasian pigs along the whole genome. ....          | 30        |
| 45 | Supplementary Table S4. D-statistics test for the phylogenetic relationships among pig populations |           |
| 46 | from different geographic regions. ....                                                            | 32        |
| 47 | Supplementary Table S5. Comparison of nucleotide diversity on autosomes and in the MSY region.     |           |
| 48 | .....                                                                                              | 34        |
| 49 | Supplementary Table S6. Higher than expected frequency of European Y chromosomes in Asian pig      |           |
| 50 | populations. ....                                                                                  | 35        |

|    |                                                                                                       |           |
|----|-------------------------------------------------------------------------------------------------------|-----------|
| 51 | Supplementary Table S7. The parameters of the best-fitted demographic models of the target pairs of   |           |
| 52 | European and Chinese pig populations. ....                                                            | 35        |
| 53 | Supplementary Table S8. The possibility of the simulated European Y frequency in Chinese pigs         |           |
| 54 | that match observed frequency in Chinese pigs. ....                                                   | 36        |
| 55 | Supplementary Table S9. The geographical distribution of the two haplogroups in a large panel of      |           |
| 56 | 426 male pigs from around the globe. ....                                                             | 37        |
| 57 | Supplementary Table S10. 44 Models tested by jModeltest for the build 11.1 Y chromosome.....          | 41        |
| 58 | Supplementary Table S11. Estimates of the TMRCA of phylogenetic nodes of particular interest          |           |
| 59 | using the MSY sequence via BEAST when divergence time estimates of <i>Sus verucosus</i> (JVWP) and    |           |
| 60 | <i>Sus scrofa</i> was set as 4.2 million years ago.....                                               | 42        |
| 61 | Supplementary Table S12. Estimates of the TMRCA of phylogenetic nodes of particular interest          |           |
| 62 | using the MSY sequence via BEAST when divergence time estimates of <i>Sus verucosus</i> (JVWP) and    |           |
| 63 | <i>Sus scrofa</i> was set as 1.36 million years ago.....                                              | 43        |
| 64 | Supplementary Table S13. Filter standard set as default options in the variant calling of Platypus. . | 43        |
| 65 | <b>4. Supplementary Figures.....</b>                                                                  | <b>44</b> |
| 66 | Supplementary Figure S1. SNPs accuracy validation by the data of 60K chip array and dual-             |           |
| 67 | resequencing. ....                                                                                    | 44        |
| 68 | Supplementary Figure S2. Autosomal SNP distribution of 200 Eurasian pigs. ....                        | 45        |
| 69 | Supplementary Figure S3. Depth distribution along the effective regions on the Y chromosome and       |           |
| 70 | chromosome 18 of Eurasian pigs based on Build 11.1 reference genome in a window size of 100 Kb        |           |
| 71 | with a step size of 50 Kb. ....                                                                       | 46        |
| 72 | Supplementary Figure S4. The pattern of heterozygous position distribution on the Y chromosome        |           |
| 73 | derived from the initial called 81,057 SNPs among all male individuals. ....                          | 47        |
| 74 | Supplementary Figure S5. The pattern of heterozygous position distribution on the Y chromosome        |           |
| 75 | derived from 68,387 SNPs after removing SNPs same as the SNPs called by the reads of female           |           |
| 76 | individuals misaligned to Y chromosome reference sequence among all male individuals. ....            | 48        |
| 77 | Supplementary Figure S6. The comparison of heterozygous sites distribution on the Y chromosome        |           |
| 78 | derived from 68,387 SNPs after removing SNPs same as the SNPs called by the reads of female           |           |
| 79 | individuals misaligned to Y chromosome reference sequence among Haplogroup A, Haplogroup E            |           |

|     |                                                                                                         |           |
|-----|---------------------------------------------------------------------------------------------------------|-----------|
| 80  | (European pigs) and Haplogroup E (Chinese pigs).....                                                    | 49        |
| 81  | Supplementary Figure S7. The comparison of heterozygous sites distribution on the MSY among             |           |
| 82  | Haplogroup A, Haplogroup E (European pigs) and Haplogroup E (Chinese pigs).....                         | 50        |
| 83  | Supplementary Figure S8. The CV error for the ADMIXTURE analysis at K values ranging from 2             |           |
| 84  | to 7.....                                                                                               | 51        |
| 85  | Supplementary Figure S9. Determination of the migration edge number in the TreeMix model and            |           |
| 86  | residual heatmap with 4 migration events.....                                                           | 52        |
| 87  | Supplementary Figure S10. Median joining haplotype network of MSY sequences (n = 102).....              | 53        |
| 88  | Supplementary Figure S11. The different haplotype patterns between the Y chromosome and the X           |           |
| 89  | chromosome in Eurasian pigs.....                                                                        | 54        |
| 90  | Supplementary Figure S12. Comparison of nucleotide variability within the proximal and distal           |           |
| 91  | regions of the Y chromosome and on autosomes.....                                                       | 55        |
| 92  | Supplementary Figure S13. Different phylogenetic relationships of Sus revealed by Y chromosome,         |           |
| 93  | mtDNA and autosomes.....                                                                                | 56        |
| 94  | Supplementary Figure S14. Median joining haplotype network of chrM sequences (n = 102).....             | 57        |
| 95  | Supplementary Figure S15. Comparisons of allele frequency spectra (AFS) between the modelled            |           |
| 96  | and real data of four pairs of European and Chinese pig populations using $\partial a \partial i$ ..... | 58        |
| 97  | Supplementary Figure S16. Comparison of fatness traits between the male pigs with Chinese               |           |
| 98  | chromosome Y and with European chromosome Y.....                                                        | 59        |
| 99  | Supplementary Figure S17. Estimated percentage of the Asian component of European pigs from an          |           |
| 100 | unsupervised ADMIXTURE analysis with K = 2.....                                                         | 60        |
| 101 | <b>5. Supplementary References .....</b>                                                                | <b>61</b> |

102

103

104 **1. Supplementary Notes**

105 **Note S1. The quality of SNP calling**

106 We employed BWA to map cleaned reads from 205 samples to Build 11.1 of the *Sus*  
107 *scrofa* reference genome and subsequently used Picard and GATK to process the  
108 mapped reads. Then we performed a two-round procedure of SNP calling using  
109 Platypus (detailed process in **supplementary methods**). Finally, a total of 37,542,852  
110 SNPs for the 205 animals were obtained, of which 36,332,442, 1,167,598, 42,288 and  
111 524 SNPs were on autosomes, the X chromosome, the Y chromosome and the  
112 mitochondrial DNA, respectively.

113 There were two Sumatran wild boars, one Celebes wild boar, one Java warty pig and  
114 one African warthog in the present 205 samples. We identified that Sumatran wild boars  
115 were largely different from Eurasian pigs. The other three animals were outgroups to  
116 *Sus scrofa*, which have many specific SNPs different from *Sus scrofa*.

117 To assess accuracy of the SNP calls, we excluded the above five animals and  
118 compared the 200-pig SNP dataset to the SNPs on the porcine 60K BeadChip  
119 genotyping array (Illumina) in 98 pigs (**supplementary table S2**). Among the SNPs  
120 called from whole-genome resequencing, 53,908 polymorphic loci present in the 60K  
121 chip array were extracted. 99.4% of informative SNPs had the same genotypes in the  
122 sequencing data as in the 60K chip arrays (**supplementary fig. S1**). In addition, we  
123 sequenced six pigs twice and called their SNPs using Platypus. We find that 99.6% were  
124 consistent with the SNPs of their duplicate individuals (**supplementary fig. S1**). Both  
125 validations demonstrated high quality and reliability of our present SNP calls.

126 We compared our SNP dataset of 200 Eurasian pigs with Build 151 of the *Sus scrofa*  
127 dbSNP dataset from the NCBI database. We found that 81.3% (29,554,672) of the SNPs  
128 on autosomes were exactly the same as the reference SNPs and 18.7% (6,777,770) were  
129 novel (**supplementary fig. S2 and supplementary table S3**). Among these novel

130 SNPs, 53.0% (3,594,384 SNPs) have MAF less than or equal to 0.05 in the 200 Eurasian  
131 pigs. Of the 36.3 million SNPs, 14.2% have minor allelic frequency (MAF) less than  
132 or equal to 0.02, 33.2% have MAF less than or equal to 0.05, 49.4% have MAF less  
133 than or equal to 0.10, and 50.6% have MAF greater than 0.10.

#### 134 **Note S2. The coverage of the Y chromosome**

135 The Y chromosome is notorious for being hard to assemble, with potentially multiple  
136 segmental duplications. Recently, a draft assembly of the pig Y chromosome (VEGA62)  
137 were generated by sequencing BAC and fosmid clones from the Duroc breed and  
138 incorporating information from optical mapping and fiber-FISH (Skinner et al. 2016).  
139 The improved porcine sex chromosomes were included in Build 11.1 of the *Sus scrofa*  
140 reference genome with comprehensive gene annotation and variant information. These  
141 improved assemblies allowed us to generate a comprehensive analysis of the  
142 evolutionary history of pigs from the perspective of sex chromosomes, especially from  
143 the unique genetic perspective of patrilineal inheritance. Before further analyses, we  
144 investigated the landscape of the Y chromosome in the perspective of coverage and  
145 depth.

146 In Build 11.1 (VEGA62 version), the total length of the Y chromosome is 43.5Mb,  
147 but the actual effective length is 20.5 Mb, which is mainly divided into three segments:  
148 0 Mb - 10.5 Mb, 19.5 Mb - 25.5 Mb, 39.5 Mb - 43.5 Mb. In addition, there is a 1.6Mb  
149 unplaced Y chromosome sequences contained in Build 11.1.

150 The observed coverage on the Y of certain individual is as expected given the  
151 haploid status of the Y and the observed genome-wide coverage for that individual. We  
152 calculated the depth of each base covered on the Y chromosome. In the whole effective  
153 range (including the unassembled region), the average number of bases across all males  
154 is 16,300,379. The average depth (median) is 12X. 13,998,561 bases are with depth  
155 greater than or equal to 5X, which accounted for 85.9% of the valid sequences.

156 1,925,952 bases are more than or equal to 2 times of the average depth, accounting for  
157 11.8% of the effective sequence, mainly distributed in the HSFY (heat shock  
158 transcription factor, Y chromosome) and the PB (proximal block) regions. The average  
159 depth in a 100Kb window sliding along the Y chromosomes with a step size of 50Kb  
160 across all 103 individuals was plotted (**supplementary fig. S3A**). We also extracted  
161 chromosome 18 as the representative of autosomal and drew the corresponding depth  
162 map (**supplementary fig. S3B**). The average ratio of Y chromosome depth to those of  
163 chromosome 18 across Eurasian male individuals was 0.51 with a standard deviation  
164 of 0.047 (**supplementary fig. S3C**). These results show that the coverage of the Y in  
165 general is consistent with its haploid state.

166 There are many heterozygous sites observed on the Y, which results from segmental  
167 duplications and possible mapping error. We initially obtained a total of 81,057 SNPs.  
168 The distribution of heterozygotes is shown in **supplementary fig. S4A**. Furthermore,  
169 we use a 150Kb window sliding along the Y chromosome to calculate the  
170 heterozygosity rate on the Y (**supplementary fig. S4C**). The heterozygosity rate  
171 fluctuates very little in the homologous region of Y chromosome (PAR) and fluctuate  
172 greatly in HSFY and PB regions. This disorderly volatility is an indicative of segmental  
173 duplications. Subsequently, 12670 SNPs on Y chromosome and on the Y-linked contig  
174 of male individuals, which were same as the SNPs called by the reads of female  
175 individuals misaligned to Y chromosome reference sequence, were excluded due to the  
176 possible bias. We also drew a map showing the distribution of heterozygous loci, the  
177 distribution of SNPs, and the change of the heterozygosity rate on Y chromosome after  
178 this filtering procedure (**supplementary fig. S5**). Moreover, we found the number of  
179 heterozygous sites within Haplogroup A ( $8748.40 \pm 762.08$ ) is significantly larger than  
180 that of Haplogroup E (European pigs and Chinese pigs:  $6062.68 \pm 993.63$  and  $6903.83$

181  $\pm 704.87$ , respectively) with *P* values of  $1.05E-17$  and  $3.19E-07$ , respectively  
182 (**supplementary fig. S6**). We specifically extract MSY data from that of the whole Y  
183 sequences. We found the number of heterozygous sites within Haplogroup A ( $5516.38$   
184  $\pm 691.31$ ) is significantly larger than that within Haplogroup E (European pigs and  
185 Chinese pigs:  $2904.61 \pm 334.49$  and  $3146.33 \pm 372.40$ , respectively) with *P* values of  
186  $5.76E-40$  and  $1.21E-16$ , respectively. The number of heterozygous sites within  
187 Haplogroup E (European pigs) and Haplogroup E (Chinese pigs) is not significantly  
188 different (**supplementary fig. S7**). When it comes to heterozygous SNPs, we replaced  
189 them with missing data on the non-homologous part of Y chromosome for subsequent  
190 analyses.

191 The depth of the effectively covered region in the PB interval (19.5 Mb - 25.5 Mb,  
192 with grey background in **supplementary fig. S3D**) of individuals within Haplogroup E  
193 is abnormally high, while those within Haplogroup A is relatively in a normal range.  
194 We calculated the average depth and the average normalized depth in the PB interval.  
195 The average depth in PB interval is the average depth derived from the above sliding-  
196 window method in this region across individuals. To obtain average normalized depth,  
197 the depth in each window of each individual is firstly divided by the average depth of  
198 whole chromosome 18 of that individual, then average depth of all windows in this  
199 region is obtained, and average depth among individuals is finally calculated.  
200 Eventually, the average depth and the average normalized depth in the PB region of  
201 individuals within Haplogroup E are  $16.25 \pm 5.70$  and  $0.83 \pm 0.07$ , respectively, while  
202 those of individuals within Haplogroup A are  $11.82 \pm 1.59$  and  $0.49 \pm 0.04$ , respectively.  
203 The former is significantly higher than the latter ( $p=1.55E-07$  and  $p=6.81E-053$   
204 corresponding to the average depth and the average normalized depth, respectively, T  
205 test).



206 **Note S3. South Chinese pigs contribute to the development of modern European**  
207 **breeds**

208 Introgression from Asian pigs into European pigs during the Industrial Revolution is  
209 well documented (Phillips and Hsu 1944; McLaren 1990; Giuffra et al. 2000; White  
210 2011). Previously several research groups detected Asian pig introgression in European  
211 pig genomes. Groenen et al. (2012) used the D-statistic to find that ~35% of the  
212 genomes of European pig breeds have introgression from Asian pigs; Bosse et al. (2014)  
213 estimated ~20% Asian fraction in modern European pigs using a total of 2,377,607  
214 autosomal markers; Bianco et al. (2015) used 60K chips to investigate 31 American and  
215 European pig populations (or breeds) originating from Europe and found they had 10-  
216 30% of introgressed DNA from Asian lineages. We also used 60K chip to investigate  
217 39 Chinese and Western pig breeds, and we found that Large White and Landrace had  
218 respectively about a 19% and 12% Asian fraction when  $K = 2$ , but as the  $K$  value  
219 increased, the Asian fraction slightly declined (Ai et al. 2014). More recently, we  
220 resequenced 69 Chinese local pigs with high quality (coverage depth  $> 25\times$ ) and  
221 downloaded the whole-genome sequence data for 42 European and Asian pigs  
222 submitted by Wageningen University. Using these data, we also detected a ~19%  
223 Chinese fraction in European pigs when  $K = 2$ , and almost all of the introgression in  
224 European pig genomes was of South Chinese origin when  $K = 3$  (Ai et al. 2015).

225 However, in our present study, 7-13% of the Asian fractions were estimated in several  
226 European commercial pigs like Large White, Landrace, Creole, and Pietrain pigs when  
227  $K = 2$ , which was slightly lower than the previous reports. The introgression in  
228 European pig genomes was mainly of South Chinese origin, and tiny amounts of East  
229 Chinese origin were also detected when  $K > 2$  (**Fig. 1D**). We considered two major  
230 reasons possibly contributing to this difference in proportion: (1) different European  
231 pig samples and (2) higher-density and high-quality SNPs.

232 In the present study, our test samples included 67 European pigs. Among these  
233 European pigs, we resequenced 31 domestic pigs at high coverage (average depth of  
234 29.9×), downloaded data for 25 domestic pigs submitted by three different research  
235 groups from the NCBI SRA database (**supplementary table S2**), and downloaded data  
236 for 11 European wild boars submitted by two groups from Wageningen University and  
237 Centre For Research in Agrigenomics from the NCBI SRA database (**supplementary**  
238 **table S2**). Except for European wild boars, all European domestic pigs in this study  
239 were different from the ones in the previous works described above. In this study, we  
240 obtained 36.3 million autosomal SNPs in the 200-pig population. The number of SNPs  
241 used here was much higher than in previous studies (i.e. 2,377,607 autosomal markers  
242 in (Bosse et al. 2014); 60K SNP chips in (Bianco et al. 2015) and in (Ai et al. 2014)).

243 To further validate our results, we used all autosomal reference variants (n=  
244 62,117,429) in *Sus scrofa* dbSNP (build 151) as known variants to guide individual  
245 genotyping for the 200 Eurasian pigs via Platypus with the parameters “--  
246 source=KnownVariants.vcf.gz --minPosterior=0 --getVariantsFromBAMs=0”. We  
247 gained 34,918,325 autosomal SNPs in the 200-pig population. Then, an unsupervised  
248 Admixture analysis was computed for the 200 individuals. Similarly, the estimated  
249 Asian fractions in European pigs were lower than previous reports, and the introgressed  
250 fractions in European pigs were of South Chinese origin with  $K = 2$  (**supplementary**  
251 **fig. S13**).

252 In summary, we consider that different samples and high-density, high-quality SNPs  
253 contribute to the different results for Asian introgression fraction in European pigs. We  
254 believe our SNP calling results and demographic and evolutionary history results  
255 inferred by autosomal SNPs are reliable and robust.

#### 256 **Note S4. Nucleotide diversity in the Y chromosome haplogroups**

257 To learn more about evolutionary history of the Y chromosome, we calculated

258 nucleotide variability at the genomic level and within the MSY region in sequenced  
259 males. The MSY region had a significantly lower level of nucleotide diversity  
260 compared to autosomes (**supplementary fig. S11 and supplementary table S5**).  
261 Moreover, all nucleotide variability parameters were lower in European pigs in  
262 Haplogroup E than in Chinese pigs in Haplogroup A (**supplementary fig. S11**). This  
263 could be explained by the fact that European wild boars suffered a more dramatic  
264 decrease in population size than Asian wild boars during the Last Glacial period (**Fig.**  
265 **1F**).

266 **Note S5. Sex-biased effect may partially contribute to low nucleotide diversity in**  
267 **the MSY region.**

268 Although many factors (such as nutrition, season of birth, stress, mother's age and  
269 parity, social status, and disease) have been shown to be associated with sex ratio at  
270 birth, the male:female ratio of offspring in pigs was consistently around 1:1 (Nishida et  
271 al. 1977; Alfonso 2005). However, several reports showed that sex ratio is significantly  
272 or slightly skewed towards females in free-roaming wild boar populations. For  
273 examples, the male:female ratio of wild boar populations living in southern Poland is  
274 approximately 1:2 (Merta et al. 2015); the male:female ratio of wild boars living in a  
275 tropical forest, Southwest China, is estimated to be 1:1.2 (Guo et al. 2017).

276 The wild boar (*Sus scrofa*) is a polygynous mammal with large litters (FernaNdez-  
277 Llario et al. 1999). Boars are typically social animals living in female-dominated  
278 populations, and adult males tend to be solitary outside the breeding season (Marsan  
279 and Mattioli 2013). During the breeding season, males drive off young animals and  
280 persistently chase the sows in a female-dominated population. Males fiercely fights  
281 potential rivals, and a single male can mate with five to 10 sows (Baskin and Danell  
282 2003). In the modern pig farming, farmers raise more reproducing sows than boars to  
283 keep benign production system. Usually the boar:sow ratio is 1:20 under natural service,

284 and less than 1:150 using artificial insemination (AI) technology (Taylor and Roesse  
285 2006; Safranski 2008)

286 In summary, almost no sex-bias exists in the new-birth offspring in pigs, but stronger  
287 boars in wild populations are potential rivals, and high-performance boars are  
288 artificially selected, and their sperm is used extensive in modern pig farming. These  
289 facts might contribute to a sex ratio skewed towards females in pigs. The extent of this  
290 sex-bias effect needs to be further investigated.

291 We have observed low nucleotide diversity in the MSY region, and its value is far  
292 less than the theoretical ratio of one quarter compared to autosomes (**supplementary**  
293 **table S5**). If we roughly treat wild boar sex ratio of 1:2 (Merta et al. 2015) as the sex-  
294 bias weight, the observed ratio is still lower than the theoretical one (1:8). Therefore,  
295 sex-biased effect may partially contribute to low nucleotide diversity in the MSY region,  
296 and there must be other biological mechanisms, such as selection, contributing to low  
297 nucleotide diversity as well.

#### 298 **Note S6. The divergence time of the MSY haplotypes**

299 FASTA formatted sequence files were used to construct phylogenetic tree via BEAST.  
300 Before constructing the phylogenetic tree, we tested 44 candidate models by  
301 jModelTest (Posada 2008). According to the value of Akaike information criterion, the  
302 best-fit model was identified as the TVM model, and the second best-fit model was the  
303 GTR model (detailed model test in **supplementary table S8**). Because the TVM model  
304 is not implemented in BEAST and considering the site heterogeneity model, we  
305 selected the GTR+ $\Gamma$  model as the best-fit model to estimate the divergence time using  
306 a strict molecular clock by BEAST. Split times and 95% highest posterior density  
307 intervals in the trees were estimated with 10,000,000 MCMC samples. The divergence  
308 time between *Sus verucosus* (JWP) and *Sus scrofa* (CB11-2) was set to be 4.2 million  
309 years (Frantz et al. 2013) and 1.36 million years (Zhang M. *et al.* manuscript submitted)

310 as the calibration constraint.

## 311 **Note S7. Introduction to the heterogeneous stock construction**

312 We constructed a heterogeneous pig population crossing eight pig breeds consisting  
313 of 4 western commercial pig breeds (including Duroc, Landrace, Large White and  
314 Pietrain) and 4 Chinese local breeds (including Erhualian, Laiwu, Bamaxiang and  
315 Tibetan), using a disc rotation breeding system. The special breeding system can avoid  
316 the increase of inbreeding coefficient and ensure the even genetic contribution of each  
317 of eight founder breeds. The details of stock construction were described by (Ji et al.  
318 2018). After six years' breeding, the sixth-generation offspring of this population (F6)  
319 were composed of 836 progeny, including 448 females and 388 males. We sequenced  
320 all 836 piglets to an average genome coverage of 7.8× (Ji et al. 2018; Zhang et al. 2021).  
321 As expected, variation was roughly uniformly distributed across the genome of this  
322 heterogeneous stock. Also, this was a unique pig population with both Asian and  
323 European MSY haplotypes. Among the 388 males, there were 150 individuals with  
324 Asian MSY haplotypes and 238 individuals with European MSY haplotypes.

## 325 **2. Supplementary Methods**

### 326 **Samples and genome sequencing**

327 We sequenced the genomes of 80 Chinese and European pigs. 83 Chinese pigs were  
328 sequenced in our previous study (Ai et al. 2015; Zhu et al. 2017). These pigs include  
329 24 South Chinese domestic pigs, 33 North Chinese domestic pigs, 36 West Chinese  
330 domestic pigs, 33 East Chinese domestic pigs, six South Chinese wild boars and 31  
331 European domestic pigs. Of these animals, Chinese pigs were from 16 geographically  
332 diverse breeds, European pigs were from 4 commercial breeds (**supplementary table**  
333 **S1**).

334 The genome sequencing was conducted as previously described (Ai et al. 2015).  
335 Genomic DNA was extracted from ear tissue using a standard phenol-chloroform  
336 method, and then individually sheared into fragments of 200-800 bp using the Covaris  
337 system (Life Technologies); DNA fragments were treated according to the Illumina  
338 DNA sample preparation protocol. These treated fragments were end-repaired, A-tailed,  
339 ligated to paired-end adaptors, and PCR amplified with 500 bp (or 350 bp) inserts for  
340 library construction. Sequencing was performed to generate 100 bp (or 125 bp, 150 bp)  
341 paired-end reads on a HiSeq 2000 (or 2500) platform (Illumina) according to the  
342 manufacture's standard protocols.

### 343 **SNP calling**

344 We downloaded genome sequence data for 42 pigs, one African warthog  
345 (*Phacochoerus africanus*), one Java warty pig (*Sus verrucosus*) and one Celebes warty  
346 pig (*Sus celebensis*) from the NCBI SRA database (<https://www.ncbi.nlm.nih.gov/sra>).  
347 These data were integrated into the sequence data obtained in this study, resulting in a  
348 205-sample high-quality data set (**supplementary table S1 and S2**). Cleaned reads  
349 from all individuals were aligned to the *Sus scrofa* reference genome (build 11.1) using  
350 BWA (Li and Durbin 2009). The mapped reads were subsequently processed by sorting,  
351 duplicate marking, indel realigning, and base quality recalibrating by Picard  
352 (<http://picard.sourceforge.net>) and GATK (McKenna et al. 2010). Sequencing coverage  
353 and depth of each sample were calculated using genomcov implemented in Bedtools  
354 (Quinlan and Hall 2010).

355 A two-round procedure of SNP calling was performed using Platypus (Rimmer et al.  
356 2014). In the first round, SNPs were individually called with the default parameters  
357 below:

```
358 python Platypus.py callVariants --bamFiles=input.bam --refFile=ref.fa --  
359 output=VariantCalls.vcf
```

360 Detailed default options were shown here: 'assemblyRegionSize': 1500,  
361 'trimReadFlank': 0, 'assembleBadReads': 1, 'minVarDist': 9, 'trimSoftClipped': 1,  
362 'minReads': 2, 'qualBinSize': 1, 'maxHaplotypes': 50, 'filterVarsByCoverage': 1,  
363 'maxSize':1500, 'originalMaxHaplotypes': 50, 'skipDifficultWindows': 0, 'parseNCBI':  
364 0, 'skipRegionsFile': None, 'noCycles': 0, 'trimAdapter': 1, 'minPosterior': 0,  
365 'assembleAll': 1, 'trimOverlapping': 1, 'filterDuplicates': 1, 'abThreshold': 0.001,  
366 'minFlank': 10, 'bufferSize': 100000, 'fileCaching': 0, 'useEMLikelihoods': 0,  
367 'coverageSamplingLevel': 30, 'calculateFlankScore': 0, 'filterReadsWithUnmapped  
368 Mates': 1, 'qdThreshold': 10, 'maxVariants': 8, 'scThreshold': 0.95,  
369 'filterReadsWithDistantMates': 1, 'maxReads': 5000000, 'badReadsWindow': 11,  
370 'genIndels': 1, 'largeWindows': 0, 'minMapQual': 20, 'maxVarDist': 15, 'maxGOF': 30,  
371 'rlen': 150, 'minGoodQualBases': 20, 'refCallBlockSize': 1000,  
372 'countOnlyExactIndelMatches': 0, 'longHaps': 0, 'HLATyping': 0,  
373 'filterReadPairsWithSmallInserts': 1, 'minBaseQual': 20, 'getVariantsFromBAMs': 0,  
374 'genSNPs': 1, 'assemble': 0, 'assemblerKmerSize': 15, 'minVarFreq': 0.05,  
375 'alignScoreFile': "", 'verbosity': 2, 'compressReads': 0, 'rmsmqThreshold': 40,  
376 'filteredReadsFrac': 0.70, 'outputRefCalls': 0, 'badReadsThreshold': 15,  
377 'hapScoreThreshold': 4, 'sbThreshold': 0.001, 'assembleBrokenPairs': 0,  
378 'mergeClusteredVariants': 1, 'maxGenotypes': 1275, 'nInd': 1.

379 In the SNP calling output, the variants were classified into nine categories marked  
380 with different FILTER labels, including PASS, HapScore, Q20, MQ, QD, SC, badReads,  
381 alleleBias, and strandBias (**supplementary table S11**). High-quality variants were  
382 marked with “PASS”; low-quality variants were marked with the other eight labels. The  
383 high-quality SNPs marked with “PASS” by Platypus with default parameters were  
384 retained. All “PASS” SNPs from all samples were merged together to form a total SNP  
385 set (84,923,342 SNPs). We removed the non-biallelic SNPs from this SNP set and

386 obtained 83,702,124 biallelic SNPs. These biallelic SNPs were treated as known  
387 variants to guide the second-round individual genotyping for all the samples via  
388 Platypus with the parameters “--source=KnownVariants.vcf.gz --minPosterior=0 --  
389 getVariantsFromBAMs=0”. SNPs in VCF format were transformed to Plink format by  
390 a custom Perl script based on genotype log10-likelihoods of AA, AB and BB genotypes.  
391 Low-quality genotypes with likelihood P-value > 0.1 were set as missing genotypes  
392 (NA). All SNPs except those on the Y chromosome were filtered with the criteria MAF >  
393 0.01 and SNP call rates > 80%. For SNPs on the Y chromosome, only male individuals  
394 were used to call SNPs with the criteria MAF > 0.009 and call rates > 80%.

#### 395 **Population genetic analysis using autosomal data**

396 A total of 36,332,442 qualified SNPs on autosomes were used to calculate genetic  
397 distance among all individuals using Plink as previously described (Ai et al. 2013). The  
398 average proportion of alleles shared was calculated as  $D_{st}$ :

$$399 \quad D_{st} = \frac{IBS2 + 0.5 \times IBS1}{N}$$

400 where IBS1 and IBS2 are the number of loci which share either 1 or 2 alleles identical  
401 by state (IBS), respectively, and N is the number of loci tested. Genetic distance  
402 between all pairwise combinations of individuals was calculated as  $1 - D_{st}$ . A neighbor-  
403 joining tree was then constructed for all individuals using Neighbor in PHYLIP v3.69  
404 (Felsenstein 2005) and visualized by FigTree software ([http://beast.bio.  
405 ed.ac.uk/FigTree](http://beast.bio.ed.ac.uk/FigTree)).

406 Population genetic structure was inferred using the maximum likelihood approach  
407 implemented in ADMIXTURE v1.20 (Alexander et al. 2009). The ADMIXTURE  
408 program was run in an unsupervised manner with a variable number of clusters (K = 2  
409 to 6). Principal component (PC) analysis was conducted using Smartpca in  
410 EIGENSOFT v6.0 (Price et al. 2006). To avoid artifacts caused by linkage



411 disequilibrium (LD), we excluded SNPs with  $r^2 \geq 0.4$  in the PC analysis.

412 TreeMix (Pickrell and Pritchard 2012) was used to infer the patterns of historical  
413 splits and mixture among Eurasian pig populations in the context of *Suidae*, with 1,000  
414 SNPs grouped together in an LD block (-k 1000) and migration events from 0 to 10,  
415 respectively. The data was pruned using PLINK toolset (version: 1.90) with parameters  
416 "--indep-pairwise 50 10 0.4" before TreeMix analyses. We further used *qpDstat* from  
417 AdmixTools (Patterson et al. 2012) to calculate D-statistics in form of  $D(\text{H1}, \text{H2}; \text{H3},$   
418 **Outgroup**) with default parameters to show if population H1 is symmetrically related  
419 to H2 and H3 or shares an excess of alleles with either of the two, with standard errors  
420 computed with a block jackknife. Based on the result of more symmetrically relation  
421 between EHL and JH compared to MIN, which was inferred by  $D(\text{EHL}, \text{JH}; \text{MIN}, \text{JWP})$   
422 equal to 0.015 with Z value 7.971, and other possible migration implied by D statistics  
423 (**supplementary table S4**), we preferred the result of TreeMix with 4 migration events  
424 based on the result of the R package OptM (Fitak 2019) with the linear method  
425 (**supplementary fig. S9**). Then 1000 bootstrap were performed with parameter "--  
426 bootstrap" to validate the pattern with 4 migration events when running TreeMix.

#### 427 **Evolutionary history analysis using Y chromosome data**

428 For the SNPs-calling procedure on Y chromosome and on a 1.6 Mb unmapped Y-  
429 linked contig, some additional quality control was conducted. We exclude the reads  
430 containing the "SA:Z" and "XA:Z" flags, so that the reads aligned uniquely to the Y  
431 chromosome can be extracted, reducing the error of the alignment on Y-chromosome.  
432 Then, the two-round SNP calling was performed using Platypus (Rimmer et al. 2014),  
433 as it was as for autosomal SNPs. Additionally, for SNPs on the Y chromosome, we  
434 replace the heterozygous SNPs with missing on the Y chromosome and then filter under  
435 the criterion  $\text{MAF} > 0.009$  and SNP call rates  $> 80\%$ . Moreover, parts of SNPs on Y

436 chromosome and on the Y-linked contig of male individuals, which were same as the  
437 SNPs called by the reads of female individuals misaligned to Y chromosome reference  
438 sequence, were excluded due to the possible bias. Finally, a total of 42,288 high-quality  
439 SNPs on Y chromosome and the Y-linked contig in the 103 male individuals passed the  
440 criteria  $MAF > 0.009$  and call rates  $> 80\%$ , which were used to show the Y chromosome  
441 haplotype, reconstruct the phylogenic tree, perform haplotype network and estimate Y  
442 chromosome divergence time.

443 Pairwise nucleotide differences per site within ( $d_x$ ) and between ( $d_{xy}$ ) populations  
444 were calculated by the following formulas as previously described (Ai et al. 2015):

445 
$$d_x = \frac{2}{n_x(n_x-1)l} \sum_{i=1}^{n_x-1} \sum_{i'=i+1}^{n_x} k_{ii'}$$

446 
$$d_{xy} = \frac{1}{n_x n_y l} \sum_{i=1}^{n_x} \sum_{j=1}^{n_y} k_{ij}$$

447 where  $k$  represents the number of differences among haplotypes within a target region,  
448  $i$  and  $j$  denote haplotypes from populations  $x$  and  $y$ , respectively, with primes indicating  
449 additional haplotypes from the same population. The expression for  $d_y$  is identical to  
450 that for  $d_x$  but with  $i$  replaced by  $j$  and  $n_x$  replaced by  $n_y$ .  $l$  denotes the effective length  
451 of the sequence without gaps in the target region.

452 To investigate global distribution of the haplotypes within the distal and proximal  
453 regions on the Y chromosome, we employed six tag SNPs representing these regions  
454 from Illumina Porcine 60K Chip in 426 Eurasian pigs from 82 geographically diverse  
455 populations. Segregating sites, Theta and Pi values were calculated for autosomes and  
456 the MSY region in 50 kb windows with a step size of 25 kb using VariScan (Hutter et  
457 al. 2006).

458

459

460 **3. Supplementary Tables**

461 **Supplementary Table S1. Samples Information.**

| No                   | Breed                   | Population code | Sample Size | Origin                       | Group                             | References                                        |
|----------------------|-------------------------|-----------------|-------------|------------------------------|-----------------------------------|---------------------------------------------------|
| <b>Chinese pigs</b>  |                         |                 |             |                              |                                   |                                                   |
| 1                    | Bama Xiang              | BMX             | 6           | Bama, Guangxi                | South Chinese domestic pig (SCDP) | Ai, et al., 2015, Nature genetics                 |
|                      | Bama Xiang              | BMX             | 6           | Bama, Guangxi                | South Chinese domestic pig (SCDP) | This study                                        |
| 2                    | Wuzhishan               | WZS             | 6           | Qiongsan, Hainan             | South Chinese domestic pig (SCDP) | Ai, et al., 2015, Nature genetics                 |
| 3                    | Luchuan                 | LUC             | 6           | Luchan, Guangxi              | South Chinese domestic pig (SCDP) | Ai, et al., 2015, Nature genetics                 |
| 4                    | Min                     | MIN             | 6           | Lanxi, Heilongjiang          | North Chinese domestic pig (NCDP) | Ai, et al., 2015, Nature genetics                 |
| 5                    | Laiwu                   | LWU             | 6           | Laiwu, Shandong              | North Chinese domestic pig (NCDP) | Ai, et al., 2015, Nature genetics                 |
|                      |                         |                 | 9           | Laiwu, Shandong              | North Chinese domestic pig (NCDP) | This study                                        |
| 6                    | Hetao                   | HT              | 6           | Wuyuan, Inner Mongolia       | North Chinese domestic pig (NCDP) | Ai, et al., 2015, Nature genetics                 |
| 7                    | Bamei                   | BAM             | 6           | Huangzhong, Qinghai          | North Chinese domestic pig (NCDP) | Zhu,et al., 2017, Genomic evolution and selection |
| 8                    | Baoshan                 | BS              | 6           | Baoshan, Yunnan              | West Chinese domestic pig (WCDP)  | Zhu,et al., 2017, Genomic evolution and selection |
| 9                    | Neijiang                | NJ              | 6           | Neijiang, Sichuan            | West Chinese domestic pig (WCDP)  | Zhu,et al., 2017, Genomic evolution and selection |
| 10                   | Jinhua                  | JH              | 6           | Jinhua, Zhejiang             | East Chinese domestic pig (ECDP)  | Zhu,et al., 2017, Genomic evolution and selection |
| 11                   | Erhualian               | EHL             | 5           | Wuxi, Jiangsu                | East Chinese domestic pig (ECDP)  | Ai, et al., 2015, Nature genetics                 |
|                      |                         |                 | 22          | Wuxi, Jiangsu                | East Chinese domestic pig (ECDP)  | This study                                        |
| 14                   | Tibetan (Sichuan)       | SCT             | 6           | Litan, Sichuan               | West Chinese domestic pig (WCDP)  | Ai, et al., 2015, Nature genetics                 |
|                      |                         |                 | 6           | Litan, Sichuan               | West Chinese domestic pig (WCDP)  | This study                                        |
|                      |                         |                 | 1           | Sichuan                      | West Chinese domestic pig (WCDP)  | Li, et al., 2013, Nature genetics                 |
| 15                   | Tibetan (Yunnan)        | YNT             | 6           | Diqing, Yunnan               | West Chinese domestic pig (WCDP)  | Ai, et al., 2015, Nature genetics                 |
|                      |                         |                 | 6           | Diqing, Yunnan               | West Chinese domestic pig (WCDP)  | This study                                        |
| 16                   | South Chinese Wild Boar | CWB             | 2           | Jiangxi, Nanchang            | Chinese wild boar (CWB)           | Ai, et al., 2015, Nature genetics                 |
|                      |                         |                 | 2           | Jiangxi, Shangyou            | Chinese wild boar (CWB)           | Ai, et al., 2015, Nature genetics                 |
|                      |                         |                 | 2           | Zhejiang, Xiangshan          | Chinese wild boar (CWB)           | Ai, et al., 2015, Nature genetics                 |
| <b>European pigs</b> |                         |                 |             |                              |                                   |                                                   |
| 17                   | White Duroc             | WDU             | 10          | USA (Originated from Europe) | European domestic pig (EDP)       | This study                                        |
| 18                   | Large White             | LW              | 7           | France, Europe               | European domestic pig (EDP)       | This study                                        |
|                      |                         |                 | 6           | Europe                       | European domestic pig (EDP)       | Kim, et al., 2015, Plos one                       |
| 19                   | Duroc                   | DU              | 11          | Europe                       | European domestic pig (EDP)       | Kim, et al., 2015, Plos one                       |
|                      | Pietrain                | PT              | 6           | Europe                       | European domestic pig (EDP)       | This study                                        |
| 20                   | Iberian                 | Ib              | 1           | Spain, Europe                | European domestic pig (EDP)       | Ramírez, et al., 2014, Heredity                   |
| 21                   | Creole                  | Cr              | 1           | Europe                       | European domestic pig (EDP)       | Ramírez, et al., 2014, Heredity                   |
| 22                   | Landrace                | LR              | 3           | Europe                       | European domestic pig (EDP)       | Kim, et al., 2015, Plos one                       |
|                      |                         |                 | 8           | Europe                       | European domestic pig (EDP)       | This study                                        |
| 23                   | Mangalica               | MG              | 3           | Hungary, Europe              | European domestic pig (EDP)       | Molnár, et al., 2014, BMC Genomics                |
| 24                   | European Boar           | Wild EUW        | 1           | Europe                       | European wild boar (EWB)          | Ramírez, et al., 2014, Heredity                   |
|                      |                         |                 | 10          | Europe                       | European wild boar (EWB)          | Frantz, et al., 2015, Nature Genetics             |
| <b>Sumatran pig</b>  |                         |                 |             |                              |                                   |                                                   |

|                  |                    |        |     |   |   |                          |                               |
|------------------|--------------------|--------|-----|---|---|--------------------------|-------------------------------|
| 25               | Sumatran<br>Boar   | Wild   | SWB | 2 | \ | Sumatran wild boar (SWB) | Groenen, et al., 2012, Nature |
| <b>Outgroups</b> |                    |        |     |   |   |                          |                               |
| 26               | Celebes Wild Boar  |        | CWP | 1 | \ | Outgroup                 | Groenen, et al., 2012, Nature |
| 27               | Java Warty Pig     |        | JWP | 1 | \ | Outgroup                 | Groenen, et al., 2012, Nature |
| 28               | African<br>Warthog | Common | AWP | 1 | \ | Outgroup                 | Groenen, et al., 2012, Nature |

---

462

463

464 **Supplementary Table S2.** Sequencing Statistics of 205 samples.

| No                  | Breed                   | Sample ID | Population code | Inferred Sex | mtDNA Origin | Y haplogroup | Coverage <sup>a</sup> | Depth (×) | ChrY Depth (×) | 60Kchip | References                        |
|---------------------|-------------------------|-----------|-----------------|--------------|--------------|--------------|-----------------------|-----------|----------------|---------|-----------------------------------|
| <b>Chinese pigs</b> |                         |           |                 |              |              |              |                       |           |                |         |                                   |
| 1                   | South Chinese Wild Boar | CB11-1    | CWB             | Female       | Chinese      | /            | 0.977                 | 25.9      | /              | Scanned | Ai, et al., 2015, Nature genetics |
| 2                   | South Chinese Wild Boar | CB11-2    | CWB             | Male         | Chinese      | Asian        | 0.981                 | 28.2      | 13.5           | Scanned | Ai, et al., 2015, Nature genetics |
| 3                   | South Chinese Wild Boar | CB11-3    | CWB             | Female       | Chinese      | /            | 0.977                 | 27.6      | /              | Scanned | Ai, et al., 2015, Nature genetics |
| 4                   | South Chinese Wild Boar | CB11-4    | CWB             | Male         | Chinese      | Asian        | 0.979                 | 21.7      | 10.7           | Scanned | Ai, et al., 2015, Nature genetics |
| 5                   | South Chinese Wild Boar | CB11-5    | CWB             | Male         | Chinese      | Asian        | 0.975                 | 20.5      | 9.8            | Scanned | Ai, et al., 2015, Nature genetics |
| 6                   | South Chinese Wild Boar | CB11-6    | CWB             | Male         | Chinese      | Asian        | 0.975                 | 21.8      | 10.3           | Scanned | Ai, et al., 2015, Nature genetics |
| 7                   | Wuzhishan               | CB1-1     | WZS             | Female       | Chinese      | /            | 0.977                 | 26.1      | /              | Scanned | Ai, et al., 2015, Nature genetics |
| 8                   | Wuzhishan               | CB1-2     | WZS             | Female       | Chinese      | /            | 0.976                 | 26.2      | /              | Scanned | Ai, et al., 2015, Nature genetics |
| 9                   | Wuzhishan               | CB1-3     | WZS             | Female       | Chinese      | /            | 0.976                 | 25.7      | /              | Scanned | Ai, et al., 2015, Nature genetics |
| 10                  | Wuzhishan               | CB1-4     | WZS             | Male         | Chinese      | European     | 0.981                 | 25.5      | 13.5           | Scanned | Ai, et al., 2015, Nature genetics |
| 11                  | Wuzhishan               | CB1-5     | WZS             | Male         | Chinese      | European     | 0.981                 | 26.2      | 13.9           | Scanned | Ai, et al., 2015, Nature genetics |
| 12                  | Wuzhishan               | CB1-6     | WZS             | Female       | Chinese      | /            | 0.975                 | 26.9      | /              | Scanned | Ai, et al., 2015, Nature genetics |
| 13                  | Luchuan                 | CB12-1    | LUC             | Female       | Chinese      | /            | 0.972                 | 23.9      | /              | Scanned | Ai, et al., 2015, Nature genetics |
| 14                  | Luchuan                 | CB12-2    | LUC             | Female       | Chinese      | /            | 0.977                 | 26.6      | /              | Scanned | Ai, et al., 2015, Nature genetics |
| 15                  | Luchuan                 | CB12-3    | LUC             | Female       | Chinese      | /            | 0.978                 | 28.5      | /              | Scanned | Ai, et al., 2015, Nature genetics |
| 16                  | Luchuan                 | CB12-4    | LUC             | Female       | Chinese      | /            | 0.974                 | 27.2      | /              | Scanned | Ai, et al., 2015, Nature genetics |
| 17                  | Luchuan                 | CB12-5    | LUC             | Female       | Chinese      | /            | 0.976                 | 27.0      | /              | Scanned | Ai, et al., 2015, Nature genetics |
| 18                  | Luchuan                 | CB12-6    | LUC             | Female       | Chinese      | /            | 0.977                 | 25.0      | /              | Scanned | Ai, et al., 2015, Nature genetics |
| 19                  | Bama Xiang              | CB8-1     | BMX             | Female       | Chinese      | /            | 0.976                 | 26.7      | /              | Scanned | Ai, et al., 2015, Nature genetics |
| 20                  | Bama Xiang              | CB8-2     | BMX             | Female       | Chinese      | /            | 0.977                 | 28.5      | /              | Scanned | Ai, et al., 2015, Nature genetics |
| 21                  | Bama Xiang              | CB8-3     | BMX             | Female       | Chinese      | /            | 0.977                 | 26.0      | /              | Scanned | Ai, et al., 2015, Nature genetics |

|    |            |        |     |        |         |          |       |      |      |         |                                                   |
|----|------------|--------|-----|--------|---------|----------|-------|------|------|---------|---------------------------------------------------|
| 22 | Bama Xiang | CB8-4  | BMX | Female | Chinese | /        | 0.977 | 27.2 | /    | Scanned | Ai, et al., 2015, Nature genetics                 |
| 23 | Bama Xiang | CB8-5  | BMX | Female | Chinese | /        | 0.977 | 27.3 | /    | Scanned | Ai, et al., 2015, Nature genetics                 |
| 24 | Bama Xiang | CB8-6  | BMX | Female | Chinese | /        | 0.977 | 27.2 | /    | Scanned | Ai, et al., 2015, Nature genetics                 |
| 25 | Bama Xiang | CB8-7  | BMX | Female | Chinese | /        | 0.992 | 30.7 | /    | /       | This study                                        |
| 26 | Bama Xiang | CB8-8  | BMX | Female | Chinese | /        | 0.992 | 30.1 | /    | /       | This study                                        |
| 27 | Bama Xiang | CB8-9  | BMX | Female | Chinese | /        | 0.976 | 26.6 | /    | /       | This study                                        |
| 28 | Bama Xiang | CB8-10 | BMX | Male   | Chinese | Asian    | 0.980 | 30.4 | 14.7 | /       | This study                                        |
| 29 | Bama Xiang | CB8-11 | BMX | Male   | Chinese | Asian    | 0.979 | 26.6 | 12.9 | /       | This study                                        |
| 30 | Bama Xiang | CB8-12 | BMX | Male   | Chinese | Asian    | 0.980 | 29.8 | 9.7  | /       | This study                                        |
| 31 | Baoshan    | CB27-1 | BS  | Male   | Chinese | European | 0.982 | 25.5 | 14.0 | /       | Zhu,et al., 2017, Genomic evolution and selection |
| 32 | Baoshan    | CB27-2 | BS  | Male   | Chinese | European | 0.981 | 25.1 | 13.7 | /       | Zhu,et al., 2017, Genomic evolution and selection |
| 33 | Baoshan    | CB27-3 | BS  | Male   | Chinese | European | 0.981 | 25.5 | 14.0 | /       | Zhu,et al., 2017, Genomic evolution and selection |
| 34 | Baoshan    | CB27-4 | BS  | Female | Chinese | /        | 0.978 | 25.8 | /    | /       | Zhu,et al., 2017, Genomic evolution and selection |
| 35 | Baoshan    | CB27-5 | BS  | Female | Chinese | /        | 0.977 | 29.2 | /    | /       | Zhu,et al., 2017, Genomic evolution and selection |
| 36 | Baoshan    | CB27-6 | BS  | Female | Chinese | /        | 0.977 | 27.8 | /    | /       | Zhu,et al., 2017, Genomic evolution and selection |
| 37 | Neijiang   | CB25-1 | NJ  | Male   | Chinese | Asian    | 0.981 | 27.2 | 13.4 | /       | Zhu,et al., 2017, Genomic evolution and selection |
| 38 | Neijiang   | CB25-2 | NJ  | Male   | Chinese | Asian    | 0.981 | 27.2 | 14.0 | Scanned | Zhu,et al., 2017, Genomic evolution and selection |
| 39 | Neijiang   | CB25-3 | NJ  | Female | Chinese | /        | 0.978 | 27.6 | /    | /       | Zhu,et al., 2017, Genomic evolution and selection |
| 40 | Neijiang   | CB25-4 | NJ  | Male   | Chinese | Asian    | 0.980 | 24.5 | 13.0 | Scanned | Zhu,et al., 2017, Genomic evolution and selection |

|    |                   |        |     |        |         |          |       |      |      |         |                                                   |
|----|-------------------|--------|-----|--------|---------|----------|-------|------|------|---------|---------------------------------------------------|
| 41 | Neijiang          | CB25-5 | NJ  | Male   | Chinese | Asian    | 0.981 | 24.9 | 13.0 | Scanned | Zhu,et al., 2017, Genomic evolution and selection |
| 42 | Neijiang          | CB25-6 | NJ  | Male   | Chinese | Asian    | 0.980 | 26.2 | 13.1 | /       | Zhu,et al., 2017, Genomic evolution and selection |
| 43 | Tibetan (Yunnan)  | CB22-1 | YNT | Male   | Chinese | Asian    | 0.981 | 25.6 | 13.0 | Scanned | This study                                        |
| 44 | Tibetan (Yunnan)  | CB22-2 | YNT | Male   | Chinese | European | 0.982 | 29.2 | 16.0 | Scanned | This study                                        |
| 45 | Tibetan (Yunnan)  | CB22-3 | YNT | Male   | Chinese | Asian    | 0.981 | 26.3 | 13.2 | /       | This study                                        |
| 46 | Tibetan (Yunnan)  | CB22-4 | YNT | Male   | Chinese | Asian    | 0.981 | 25.6 | 12.9 | Scanned | This study                                        |
| 47 | Tibetan (Yunnan)  | CB22-5 | YNT | Male   | Chinese | Asian    | 0.981 | 25.0 | 12.4 | /       | This study                                        |
| 48 | Tibetan (Yunnan)  | CB22-6 | YNT | Male   | Chinese | Asian    | 0.981 | 25.3 | 12.9 | Scanned | This study                                        |
| 49 | Tibetan (Yunnan)  | CB3-1  | YNT | Male   | Chinese | Asian    | 0.982 | 27.7 | 13.6 | /       | Ai, et al., 2015, Nature genetics                 |
| 50 | Tibetan (Yunnan)  | CB3-2  | YNT | Male   | Chinese | Asian    | 0.980 | 28.6 | 14.4 | Scanned | Ai, et al., 2015, Nature genetics                 |
| 51 | Tibetan (Yunnan)  | CB3-3  | YNT | Male   | Chinese | Asian    | 0.981 | 28.1 | 13.7 | Scanned | Ai, et al., 2015, Nature genetics                 |
| 52 | Tibetan (Yunnan)  | CB3-4  | YNT | Male   | Chinese | Asian    | 0.982 | 26.8 | 12.6 | Scanned | Ai, et al., 2015, Nature genetics                 |
| 53 | Tibetan (Yunnan)  | CB3-5  | YNT | Male   | Chinese | Asian    | 0.982 | 26.6 | 13.4 | Scanned | Ai, et al., 2015, Nature genetics                 |
| 54 | Tibetan (Yunnan)  | CB3-6  | YNT | Male   | Chinese | Asian    | 0.981 | 22.1 | 12.7 | Scanned | Ai, et al., 2015, Nature genetics                 |
| 55 | Tibetan (Sichuan) | CB23-1 | SCT | Male   | Chinese | Asian    | 0.981 | 25.8 | 12.8 | Scanned | This study                                        |
| 56 | Tibetan (Sichuan) | CB23-2 | SCT | Male   | Chinese | Asian    | 0.981 | 28.9 | 15.4 | Scanned | This study                                        |
| 57 | Tibetan (Sichuan) | CB23-3 | SCT | Male   | Chinese | Asian    | 0.980 | 25.5 | 13.2 | Scanned | This study                                        |
| 58 | Tibetan (Sichuan) | CB23-4 | SCT | Male   | Chinese | Asian    | 0.981 | 28.2 | 14.6 | Scanned | This study                                        |
| 59 | Tibetan (Sichuan) | CB23-5 | SCT | Male   | Chinese | Asian    | 0.981 | 25.0 | 13.1 | Scanned | This study                                        |
| 60 | Tibetan (Sichuan) | CB23-6 | SCT | Male   | Chinese | Asian    | 0.980 | 26.2 | 13.1 | Scanned | This study                                        |
| 61 | Tibetan (Sichuan) | CB4-1  | SCT | Female | Chinese | /        | 0.976 | 27.1 | /    | Scanned | Ai, et al., 2015, Nature genetics                 |
| 62 | Tibetan (Sichuan) | CB4-2  | SCT | Female | Chinese | /        | 0.976 | 26.2 | /    | Scanned | Ai, et al., 2015, Nature genetics                 |
| 63 | Tibetan (Sichuan) | CB4-3  | SCT | Male   | Chinese | Asian    | 0.980 | 26.3 | 13.5 | Scanned | Ai, et al., 2015, Nature genetics                 |
| 64 | Tibetan (Sichuan) | CB4-4  | SCT | Male   | Chinese | Asian    | 0.980 | 26.8 | 13.9 | Scanned | Ai, et al., 2015, Nature genetics                 |

|    |                   |           |     |        |         |       |       |      |      |         |                                                   |
|----|-------------------|-----------|-----|--------|---------|-------|-------|------|------|---------|---------------------------------------------------|
| 65 | Tibetan (Sichuan) | CB4-5     | SCT | Male   | Chinese | Asian | 0.980 | 28.3 | 14.6 | Scanned | Ai, et al., 2015, Nature genetics                 |
| 66 | Tibetan (Sichuan) | CB4-6     | SCT | Male   | Chinese | Asian | 0.979 | 27.0 | 13.5 | Scanned | Ai, et al., 2015, Nature genetics                 |
| 67 | Tibetan (Sichuan) | SRS387327 | SCT | Female | Chinese | /     | 0.978 | 34.3 | /    | /       | Li, et al., 2013, Nature genetics                 |
| 68 | Jinhua            | CB20-1    | JH  | Female | Chinese | /     | 0.977 | 24.8 | /    | Scanned | Zhu,et al., 2017, Genomic evolution and selection |
| 69 | Jinhua            | CB20-2    | JH  | Female | Chinese | /     | 0.977 | 29.5 | /    | Scanned | Zhu,et al., 2017, Genomic evolution and selection |
| 70 | Jinhua            | CB20-3    | JH  | Male   | Chinese | Asian | 0.981 | 25.3 | 13.0 | Scanned | Zhu,et al., 2017, Genomic evolution and selection |
| 71 | Jinhua            | CB20-4    | JH  | Male   | Chinese | Asian | 0.980 | 27.0 | 14.2 | Scanned | Zhu,et al., 2017, Genomic evolution and selection |
| 72 | Jinhua            | CB20-5    | JH  | Female | Chinese | /     | 0.977 | 24.4 | /    | Scanned | Zhu,et al., 2017, Genomic evolution and selection |
| 73 | Jinhua            | CB20-6    | JH  | Male   | Chinese | Aisan | 0.981 | 26.4 | 13.7 | /       | Zhu,et al., 2017, Genomic evolution and selection |
| 74 | Erhualian         | CB10-1    | EHL | Female | Chinese | /     | 0.976 | 27.6 | /    | Scanned | Ai, et al., 2015, Nature genetics                 |
| 75 | Erhualian         | CB10-2    | EHL | Female | Chinese | /     | 0.976 | 26.9 | /    | Scanned | Ai, et al., 2015, Nature genetics                 |
| 76 | Erhualian         | F0-1190   | EHL | Female | Chinese | /     | 0.977 | 25.8 | /    | Scanned | This study                                        |
| 77 | Erhualian         | F0-126    | EHL | Female | Chinese | /     | 0.977 | 26.2 | /    | /       | This study                                        |
| 78 | Erhualian         | F0-142    | EHL | Female | Chinese | /     | 0.977 | 25.9 | /    | Scanned | This study                                        |
| 79 | Erhualian         | F0-146    | EHL | Female | Chinese | /     | 0.977 | 25.5 | /    | Scanned | This study                                        |
| 80 | Erhualian         | F0-174    | EHL | Female | Chinese | /     | 0.977 | 26.1 | /    | Scanned | This study                                        |
| 81 | Erhualian         | F0-196    | EHL | Female | Chinese | /     | 0.977 | 26.0 | /    | Scanned | This study                                        |
| 82 | Erhualian         | F0-292    | EHL | Female | Chinese | /     | 0.977 | 25.7 | /    | Scanned | This study                                        |
| 83 | Erhualian         | F0-38     | EHL | Female | Chinese | /     | 0.977 | 24.6 | /    | Scanned | This study                                        |
| 84 | Erhualian         | F0-52     | EHL | Female | Chinese | /     | 0.977 | 25.9 | /    | Scanned | This study                                        |
| 85 | Erhualian         | F0-54     | EHL | Female | Chinese | /     | 0.977 | 25.5 | /    | Scanned | This study                                        |
| 86 | Erhualian         | F0-58     | EHL | Female | Chinese | /     | 0.977 | 26.3 | /    | Scanned | This study                                        |



|     |           |         |     |        |         |       |       |      |      |         |                                   |
|-----|-----------|---------|-----|--------|---------|-------|-------|------|------|---------|-----------------------------------|
| 87  | Erhualian | F0-68   | EHL | Female | Chinese | /     | 0.977 | 25.9 | /    | Scanned | This study                        |
| 88  | Erhualian | F0-74   | EHL | Female | Chinese | /     | 0.977 | 26.6 | /    | Scanned | This study                        |
| 89  | Erhualian | F0-124  | EHL | Female | Chinese | /     | 0.978 | 37.2 | /    | Scanned | This study                        |
| 90  | Erhualian | F0-202  | EHL | Female | Chinese | /     | 0.979 | 37.0 | /    | Scanned | Ai, et al., 2015, Nature genetics |
| 91  | Erhualian | F0-90   | EHL | Female | Chinese | /     | 0.978 | 35.9 | /    | Scanned | Ai, et al., 2015, Nature genetics |
| 92  | Erhualian | F0-94   | EHL | Female | Chinese | /     | 0.979 | 36.6 | /    | Scanned | Ai, et al., 2015, Nature genetics |
| 93  | Erhualian | CB10-3  | EHL | Male   | Chinese | Asian | 0.980 | 25.9 | 12.5 | /       | This study                        |
| 94  | Erhualian | CB10-4  | EHL | Male   | Chinese | Asian | 0.981 | 27.1 | 12.7 | /       | This study                        |
| 95  | Erhualian | CB10-5  | EHL | Male   | Chinese | Asian | 0.981 | 27.7 | 12.3 | Scanned | This study                        |
| 96  | Erhualian | CB10-6  | EHL | Female | Chinese | /     | 0.977 | 32.9 | /    | /       | This study                        |
| 97  | Erhualian | CB10-7  | EHL | Female | Chinese | /     | 0.977 | 30.9 | /    | /       | This study                        |
| 98  | Erhualian | CB10-8  | EHL | Female | Chinese | /     | 0.978 | 27.8 | /    | /       | This study                        |
| 99  | Erhualian | CB10-9  | EHL | Female | Chinese | /     | 0.977 | 25.4 | /    | /       | This study                        |
| 100 | Erhualian | CB10-10 | EHL | Male   | Chinese | Asian | 0.980 | 25.1 | 12.4 | /       | This study                        |
| 101 | Laiwu     | CB9-1   | LWU | Male   | Chinese | Asian | 0.979 | 25.5 | 12.4 | Scanned | Ai, et al., 2015, Nature genetics |
| 102 | Laiwu     | CB9-2   | LWU | Male   | Chinese | Asian | 0.979 | 24.0 | 11.7 | Scanned | Ai, et al., 2015, Nature genetics |
| 103 | Laiwu     | CB9-3   | LWU | Male   | Chinese | Asian | 0.980 | 27.7 | 13.1 | Scanned | Ai, et al., 2015, Nature genetics |
| 104 | Laiwu     | CB9-4   | LWU | Male   | Chinese | Asian | 0.980 | 26.7 | 12.9 | Scanned | Ai, et al., 2015, Nature genetics |
| 105 | Laiwu     | CB9-5   | LWU | Male   | Chinese | Asian | 0.980 | 26.7 | 13.8 | Scanned | Ai, et al., 2015, Nature genetics |
| 106 | Laiwu     | CB9-6   | LWU | Male   | Chinese | Asian | 0.980 | 26.3 | 13.3 | Scanned | Ai, et al., 2015, Nature genetics |
| 107 | Laiwu     | CB9-7   | LWU | Female | Chinese | /     | 0.977 | 25.4 | /    | /       | This study                        |
| 108 | Laiwu     | CB9-8   | LWU | Female | Chinese | /     | 0.977 | 27.0 | /    | /       | This study                        |
| 109 | Laiwu     | CB9-9   | LWU | Female | Chinese | /     | 0.977 | 24.3 | /    | /       | This study                        |
| 110 | Laiwu     | CB9-10  | LWU | Female | Chinese | /     | 0.976 | 30.4 | /    | /       | This study                        |
| 111 | Laiwu     | CB9-11  | LWU | Male   | Chinese | Asian | 0.981 | 32.2 | 13.2 | /       | This study                        |

|     |       |        |     |        |         |          |       |      |      |         |                                                   |
|-----|-------|--------|-----|--------|---------|----------|-------|------|------|---------|---------------------------------------------------|
| 112 | Laiwu | CB9-12 | LWU | Male   | Chinese | Asian    | 0.980 | 25.6 | 12.6 | /       | This study                                        |
| 113 | Laiwu | CB9-13 | LWU | Male   | Chinese | Asian    | 0.980 | 28.5 | 13.1 | /       | This study                                        |
| 114 | Laiwu | CB9-14 | LWU | Male   | Chinese | Asian    | 0.980 | 33.2 | 16.1 | /       | This study                                        |
| 115 | Laiwu | CB9-15 | LWU | Male   | Chinese | Asian    | 0.980 | 28.7 | 13.4 | /       | This study                                        |
| 116 | Bamei | CB26-1 | BAM | Male   | Chinese | Asian    | 0.979 | 23.3 | 12.1 | Scanned | Zhu,et al., 2017, Genomic evolution and selection |
| 117 | Bamei | CB26-2 | BAM | Male   | Chinese | Asian    | 0.981 | 23.3 | 11.5 | Scanned | Zhu,et al., 2017, Genomic evolution and selection |
| 118 | Bamei | CB26-3 | BAM | Male   | Chinese | Asian    | 0.981 | 28.2 | 13.6 | Scanned | Zhu,et al., 2017, Genomic evolution and selection |
| 119 | Bamei | CB26-4 | BAM | Male   | Chinese | Asian    | 0.980 | 23.8 | 12.0 | Scanned | Zhu,et al., 2017, Genomic evolution and selection |
| 120 | Bamei | CB26-5 | BAM | Male   | Chinese | Asian    | 0.980 | 26.3 | 13.7 | Scanned | Zhu,et al., 2017, Genomic evolution and selection |
| 121 | Bamei | CB26-6 | BAM | Male   | Chinese | Asian    | 0.981 | 24.3 | 12.3 | Scanned | Zhu,et al., 2017, Genomic evolution and selection |
| 122 | Hetao | CB6-1  | HT  | Female | Chinese | /        | 0.975 | 26.0 | /    | Scanned | Ai, et al., 2015, Nature genetics                 |
| 123 | Hetao | CB6-2  | HT  | Female | Chinese | /        | 0.975 | 25.1 | /    | Scanned | Ai, et al., 2015, Nature genetics                 |
| 124 | Hetao | CB6-3  | HT  | Male   | Chinese | European | 0.971 | 20.4 | 11.3 | Scanned | Ai, et al., 2015, Nature genetics                 |
| 125 | Hetao | CB6-4  | HT  | Male   | Chinese | Asian    | 0.979 | 24.5 | 12.0 | Scanned | Ai, et al., 2015, Nature genetics                 |
| 126 | Hetao | CB6-5  | HT  | Female | Chinese | /        | 0.976 | 25.5 | /    | Scanned | Ai, et al., 2015, Nature genetics                 |
| 127 | Hetao | CB6-6  | HT  | Female | Chinese | /        | 0.973 | 24.8 | /    | Scanned | Ai, et al., 2015, Nature genetics                 |
| 128 | Min   | CB7-1  | MIN | Female | Chinese | /        | 0.975 | 26.0 | /    | Scanned | Ai, et al., 2015, Nature genetics                 |
| 129 | Min   | CB7-2  | MIN | Male   | Chinese | European | 0.979 | 25.6 | 13.3 | Scanned | Ai, et al., 2015, Nature genetics                 |
| 130 | Min   | CB7-3  | MIN | Male   | Chinese | European | 0.981 | 26.5 | 13.8 | Scanned | Ai, et al., 2015, Nature genetics                 |
| 131 | Min   | CB7-4  | MIN | Male   | Chinese | European | 0.978 | 26.1 | 14.1 | Scanned | Ai, et al., 2015, Nature genetics                 |
| 132 | Min   | CB7-5  | MIN | Male   | Chinese | European | 0.977 | 23.5 | 12.8 | Scanned | Ai, et al., 2015, Nature genetics                 |
| 133 | Min   | CB7-6  | MIN | Male   | Chinese | European | 0.979 | 27.0 | 14.6 | Scanned | Ai, et al., 2015, Nature genetics                 |

### European pigs

|     |             |            |     |        |          |          |       |      |      |         |                                 |
|-----|-------------|------------|-----|--------|----------|----------|-------|------|------|---------|---------------------------------|
| 134 | White Duroc | F0-73      | WDU | Male   | European | European | 0.983 | 36.1 | 21.4 | Scanned | This study                      |
| 135 | White Duroc | F0-75      | WDU | Male   | European | European | 0.983 | 37.5 | 19.9 | Scanned | This study                      |
| 136 | White Duroc | EB4-1      | WDU | Male   | Chinese  | European | 0.983 | 32.7 | 16.9 | /       | This study                      |
| 137 | White Duroc | EB4-2      | WDU | Male   | Chinese  | European | 0.982 | 31.0 | 14.5 | /       | This study                      |
| 138 | White Duroc | EB4-3      | WDU | Female | European | /        | 0.978 | 26.7 | /    | /       | This study                      |
| 139 | White Duroc | EB4-4      | WDU | Male   | Chinese  | European | 0.983 | 33.0 | 15.1 | /       | This study                      |
| 140 | White Duroc | EB4-5      | WDU | Female | Chinese  | /        | 0.979 | 28.6 | /    | /       | This study                      |
| 141 | White Duroc | EB4-6      | WDU | Male   | European | European | 0.982 | 28.0 | 14.2 | /       | This study                      |
| 142 | White Duroc | EB4-7      | WDU | Female | Chinese  | /        | 0.978 | 24.4 | /    | /       | This study                      |
| 143 | White Duroc | EB4-8      | WDU | Female | European | /        | 0.979 | 33.4 | /    | /       | This study                      |
| 144 | Iberian     | SRR1513307 | Ib  | Male   | European | European | 0.969 | 13.8 | 6.2  | /       | Ramírez, et al., 2014, Heredity |
| 145 | Creole      | SRR1513309 | Cr  | Female | European | /        | 0.968 | 13.9 | /    | /       | Ramírez, et al., 2014, Heredity |
| 146 | Duroc       | DRC1729    | DU  | Female | European | /        | 0.979 | 15.2 | /    | /       | Kim, et al., 2015, Plos one     |
| 147 | Duroc       | DRC1735    | DU  | Female | European | /        | 0.979 | 17.3 | /    | /       | Kim, et al., 2015, Plos one     |
| 148 | Duroc       | DRC1795    | DU  | Female | European | /        | 0.981 | 17.1 | /    | /       | Kim, et al., 2015, Plos one     |
| 149 | Duroc       | DRC25-24   | DU  | Female | European | /        | 0.979 | 16.6 | /    | /       | Kim, et al., 2015, Plos one     |
| 150 | Duroc       | DRC25-78   | DU  | Female | European | /        | 0.978 | 14.9 | /    | /       | Kim, et al., 2015, Plos one     |
| 151 | Duroc       | DRC26-23   | DU  | Female | European | /        | 0.979 | 16.9 | /    | /       | Kim, et al., 2015, Plos one     |
| 152 | Duroc       | DRC26-66   | DU  | Female | European | /        | 0.978 | 15.1 | /    | /       | Kim, et al., 2015, Plos one     |
| 153 | Duroc       | DRC27-20   | DU  | Female | European | /        | 0.979 | 17.6 | /    | /       | Kim, et al., 2015, Plos one     |
| 154 | Duroc       | DRC27-81   | DU  | Female | European | /        | 0.978 | 15.7 | /    | /       | Kim, et al., 2015, Plos one     |
| 155 | Duroc       | DRCDA973   | DU  | Female | European | /        | 0.978 | 16.4 | /    | /       | Kim, et al., 2015, Plos one     |

6

|     |             |              |    |        |          |          |       |      |      |   |                             |
|-----|-------------|--------------|----|--------|----------|----------|-------|------|------|---|-----------------------------|
| 156 | Duroc       | DRCDA973     | DU | Female | European | /        | 0.978 | 15.2 | /    | / | Kim, et al., 2015, Plos one |
|     |             | 8            |    |        |          |          |       |      |      |   |                             |
| 157 | Landrace    | EB1-1        | LR | Male   | European | European | 0.981 | 26.5 | 12.6 | / | This study                  |
| 158 | Landrace    | EB1-2        | LR | Male   | European | European | 0.981 | 31.7 | 11.3 | / | This study                  |
| 159 | Landrace    | EB1-3        | LR | Female | European | /        | 0.978 | 25.0 | /    | / | This study                  |
| 160 | Landrace    | EB1-4        | LR | Female | European | /        | 0.979 | 37.9 | /    | / | This study                  |
| 161 | Landrace    | EB1-5        | LR | Male   | European | European | 0.982 | 26.4 | 12.9 | / | This study                  |
| 162 | Landrace    | EB1-6        | LR | Female | Chinese  | /        | 0.979 | 34.3 | /    | / | This study                  |
| 163 | Landrace    | EB1-7        | LR | Female | Chinese  | /        | 0.979 | 31.2 | /    | / | This study                  |
| 164 | Landrace    | EB1-8        | LR | Female | European | /        | 0.979 | 29.1 | /    | / | This study                  |
| 165 | Landrace    | LRS_10       | LR | Female | European | /        | 0.967 | 14.1 | /    | / | Kim, et al., 2015, Plos one |
| 166 | Landrace    | LRS_11       | LR | Female | European | /        | 0.967 | 14.5 | /    | / | Kim, et al., 2015, Plos one |
| 167 | Landrace    | LRS_14       | LR | Female | European | /        | 0.971 | 13.7 | /    | / | Kim, et al., 2015, Plos one |
| 168 | Large White | EB2-1        | LW | Male   | Chinese  | European | 0.982 | 24.9 | 13.0 | / | This study                  |
| 169 | Large White | EB2-2        | LW | Female | Chinese  | /        | 0.978 | 33.9 | /    | / | This study                  |
| 170 | Large White | EB2-3        | LW | Female | Chinese  | /        | 0.978 | 28.6 | /    | / | This study                  |
| 171 | Large White | EB2-4        | LW | Female | Chinese  | /        | 0.978 | 27.0 | /    | / | This study                  |
| 172 | Large White | EB2-5        | LW | Female | Chinese  | /        | 0.978 | 27.5 | /    | / | This study                  |
| 173 | Large White | EB2-6        | LW | Male   | Chinese  | European | 0.981 | 23.5 | 12.4 | / | This study                  |
| 174 | Large White | EB2-7        | LW | Male   | European | European | 0.982 | 28.7 | 13.7 | / | This study                  |
| 175 | Large White | YorkshireKL1 | LW | Male   | Chinese  | European | 0.979 | 17.0 | 6.9  | / | Kim, et al., 2015, Plos one |
| 176 | Large White | YorkshireKL2 | LW | Male   | Chinese  | European | 0.979 | 16.8 | 7.4  | / | Kim, et al., 2015, Plos one |
| 177 | Large White | YorkshireKL3 | LW | Male   | Chinese  | European | 0.981 | 16.4 | 6.5  | / | Kim, et al., 2015, Plos one |
| 178 | Large White | YorkshireKL4 | LW | Male   | Chinese  | European | 0.979 | 16.3 | 6.3  | / | Kim, et al., 2015, Plos one |
| 179 | Large White | YorkshireKL6 | LW | Female | Chinese  | /        | 0.977 | 16.9 | /    | / | Kim, et al., 2015, Plos one |
| 180 | Large White | YorkshireKL7 | LW | Female | Chinese  | /        | 0.978 | 26.1 | /    | / | Kim, et al., 2015, Plos one |

|                            |                    |            |     |        |          |          |       |      |      |   |                                       |
|----------------------------|--------------------|------------|-----|--------|----------|----------|-------|------|------|---|---------------------------------------|
| 181                        | Pietrain           | EB3-1      | PT  | Male   | European | European | 0.982 | 28.9 | 15.0 | / | This study                            |
| 182                        | Pietrain           | EB3-2      | PT  | Male   | European | European | 0.981 | 27.2 | 14.2 | / | This study                            |
| 183                        | Pietrain           | EB3-3      | PT  | Male   | European | European | 0.983 | 35.4 | 18.3 | / | This study                            |
| 184                        | Pietrain           | EB3-4      | PT  | Female | Chinese  | /        | 0.978 | 24.8 | /    | / | This study                            |
| 185                        | Pietrain           | EB3-5      | PT  | Female | European | /        | 0.978 | 27.9 | /    | / | This study                            |
| 186                        | Pietrain           | EB3-6      | PT  | Male   | European | European | 0.983 | 33.8 | 15.7 | / | This study                            |
| 187                        | Mangalica          | SRR1178916 | MG  | Male   | European | European | 0.980 | 16.1 | 8.0  | / | Molnár, et al., 2014, BMC Genomics    |
| 188                        | Mangalica          | SRR1178923 | MG  | Male   | European | European | 0.970 | 11.5 | 4.8  | / | Molnár, et al., 2014, BMC Genomics    |
| 189                        | Mangalica          | SRR1178925 | MG  | Male   | European | European | 0.980 | 16.5 | 8.5  | / | Molnár, et al., 2014, BMC Genomics    |
| 190                        | European Wild Boar | WB25U11    | EUW | Male   | European | European | 0.974 | 11.3 | 6.8  | / | Frantz, et al., 2015, Nature Genetics |
| 191                        | European Wild Boar | WB28M39    | EUW | Male   | European | European | 0.975 | 13.4 | 6.6  | / | Frantz, et al., 2015, Nature Genetics |
| 192                        | European Wild Boar | SRR1513306 | EUW | Male   | European | European | 0.982 | 14.9 | 7.5  | / | Ramírez, et al., 2014, Heredity       |
| 193                        | European Wild Boar | WB21F04    | EUW | Female | European | /        | 0.978 | 16.7 | /    | / | Frantz, et al., 2015, Nature Genetics |
| 194                        | European Wild Boar | WB21M05    | EUW | Male   | European | European | 0.983 | 23.4 | 8.9  | / | Frantz, et al., 2015, Nature Genetics |
| 195                        | European Wild Boar | WB22M03    | EUW | Male   | European | European | 0.980 | 15.1 | 7.0  | / | Frantz, et al., 2015, Nature Genetics |
| 196                        | European Wild Boar | WB33U04    | EUW | Male   | European | European | 0.981 | 13.3 | 6.7  | / | Frantz, et al., 2015, Nature Genetics |
| 197                        | European Wild Boar | WB42M09    | EUW | Female | European | /        | 0.978 | 14.7 | /    | / | Frantz, et al., 2015, Nature Genetics |
| 198                        | European Wild Boar | WB44U06    | EUW | Female | European | /        | 0.978 | 14.1 | /    | / | Frantz, et al., 2015, Nature Genetics |
| 199                        | European Wild Boar | WB44U07    | EUW | Female | European | /        | 0.977 | 12.7 | /    | / | Frantz, et al., 2015, Nature Genetics |
| 200                        | European Wild Boar | WB21M03    | EUW | Male   | European | European | 0.980 | 15.1 | 6.7  | / | Frantz, et al., 2015, Nature Genetics |
| <b>Sumatran wild boars</b> |                    |            |     |        |          |          |       |      |      |   |                                       |
| 201                        | Sumatran Wild Boar | ERR173176  | SWB | Female | /        | /        | 0.802 | 11.3 | /    | / | Groenen, et al., 2012, Nature         |
| 202                        | Sumatran Wild Boar | ERR173178  | SWB | Male   | /        | /        | 0.799 | 11.0 | 3.5  | / | Groenen, et al., 2012, Nature         |
| <b>Outgroups</b>           |                    |            |     |        |          |          |       |      |      |   |                                       |
|                            |                    |            |     |        |          |          |       |      |      | / |                                       |

|     |                        |           |     |        |   |   |       |      |      |   |                                       |
|-----|------------------------|-----------|-----|--------|---|---|-------|------|------|---|---------------------------------------|
| 203 | African Common Warthog | ERR173203 | AWP | Female | / | / | 0.780 | 13.1 | /    | / | Groenen, et al., 2012, Nature         |
| 204 | Java Warty Pig         | ERR977084 | JWP | Male   | / | / | 0.980 | 45.7 | 19.4 | / | Frantz, et al., 2015, Nature Genetics |
| 205 | Celebes Wild Boar      | ERR173210 | CWP | Female | / | / | 0.819 | 23.9 | /    | / | Groenen, et al., 2012, Nature         |

a, The 4 genome sequence data downloaded from the NCBI SRA database, denoted with blue float number here, were extracted from their alignment files; their genome coverages were all smaller than 0.82.

465

466 **Supplementary Table S3.** SNPs statistics of 200 Eurasian pigs along the whole genome.

| <b>Chromosome</b> | <b>SNPs of our data<sup>a</sup></b> | <b>SNPs in dbSNP<sup>b</sup></b> | <b>Common SNPs between our data and dbSNP</b> | <b>Proportion of common SNPs</b> | <b>Novel SNPs in our data compared to dbSNP</b> | <b>Proportion of novel SNPs</b> |
|-------------------|-------------------------------------|----------------------------------|-----------------------------------------------|----------------------------------|-------------------------------------------------|---------------------------------|
| chr1              | 3564719                             | 6343241                          | 2884835                                       | 80.9%                            | 679884                                          | 19.1%                           |
| chr2              | 2321609                             | 4101086                          | 1892176                                       | 81.5%                            | 429433                                          | 18.5%                           |
| chr3              | 2213970                             | 3699676                          | 1786700                                       | 80.7%                            | 427270                                          | 19.3%                           |
| chr4              | 2123108                             | 3731799                          | 1785100                                       | 84.1%                            | 338008                                          | 15.9%                           |
| chr5              | 1790803                             | 2901033                          | 1380722                                       | 77.1%                            | 410081                                          | 22.9%                           |
| chr6              | 2638342                             | 4046647                          | 1973616                                       | 74.8%                            | 664726                                          | 25.2%                           |
| chr7              | 2088205                             | 3575023                          | 1730578                                       | 82.9%                            | 357627                                          | 17.1%                           |
| chr8              | 2198478                             | 3865719                          | 1813779                                       | 82.5%                            | 384699                                          | 17.5%                           |
| chr9              | 2326329                             | 4057285                          | 1950839                                       | 83.9%                            | 375490                                          | 16.1%                           |
| chr10             | 1506527                             | 2574859                          | 1267666                                       | 84.1%                            | 238861                                          | 15.9%                           |
| chr11             | 1502467                             | 2564529                          | 1236119                                       | 82.3%                            | 266348                                          | 17.7%                           |
| chr12             | 1180906                             | 1855147                          | 922166                                        | 78.1%                            | 258740                                          | 21.9%                           |
| chr13             | 2782549                             | 4932653                          | 2240889                                       | 80.5%                            | 541660                                          | 19.5%                           |
| chr14             | 2193738                             | 3898861                          | 1839568                                       | 83.9%                            | 354170                                          | 16.1%                           |
| chr15             | 2135572                             | 3647251                          | 1732300                                       | 81.1%                            | 403272                                          | 18.9%                           |
| chr16             | 1430666                             | 2458662                          | 1195541                                       | 83.6%                            | 235125                                          | 16.4%                           |
| chr17             | 1239531                             | 2038315                          | 1010548                                       | 81.5%                            | 228983                                          | 18.5%                           |
| chr18             | 1094923                             | 1825643                          | 911530                                        | 83.3%                            | 183393                                          | 16.7%                           |
| chrX              | 1167598                             | 1742989                          | 934505                                        | 80.0%                            | 233093                                          | 20.0%                           |
| chrY              | 42288                               | 21025                            | 1642                                          | 3.9%                             | 40646                                           | 96.1%                           |
| chrM              | 524                                 | 335                              | 200                                           | 38.2%                            | 324                                             | 61.8%                           |

---

**a,** Except chrY and chrM, SNPs on the other chromosomes were called using 200 Eurassian pigs; SNPs on the chrY and chrM were called using all male pigs, including 101 Eurasian pigs, one Sumatran wild boar and one Java Warty pig.

**b,** Build 151 of the *Sus scrofa* dbSNP dataset from the NCBI database.

467



468 **Supplementary Table S4.** D-statistics test for the phylogenetic relationships among  
 469 pig populations from different geographic regions.

| Migration         |                 | Pop1 (W) | Pop2 (X) | Pop3 (Y) | Pop4 (Outgroup) | D-statistics | se.    | Z score |
|-------------------|-----------------|----------|----------|----------|-----------------|--------------|--------|---------|
| EHL <-> HT        |                 | HT       | BAM      | EHL      | AWP             | 0.020        | 0.0019 | 10.371  |
|                   |                 | EHL      | JH       | HT       | AWP             | 0.019        | 0.0020 | 9.826   |
| EHL <-> MIN       |                 | MIN      | BAM      | EHL      | AWP             | 0.005        | 0.0020 | 2.617   |
|                   |                 | EHL      | JH       | MIN      | AWP             | 0.015        | 0.0019 | 7.971   |
| HT <-> MIN        |                 | HT       | BAM      | MIN      | AWP             | 0.018        | 0.0021 | 8.767   |
| HT <-> LWU        |                 | HT       | BAM      | LWU      | AWP             | 0.011        | 0.0020 | 5.292   |
| HT <-> BAM        |                 | HT       | MIN      | BAM      | AWP             | 0.016        | 0.0020 | 7.813   |
|                   |                 | HT       | LWU      | BAM      | AWP             | 0.013        | 0.0021 | 5.821   |
| European -> Asian | MG -> MIN       | MIN      | HT       | MG       | AWP             | 0.030        | 0.0037 | 8.154   |
|                   |                 | MG       | EWB      | MIN      | AWP             | 0.021        | 0.0023 | 8.996   |
|                   |                 | DU       | EWB      | MIN      | AWP             | 0.023        | 0.0029 | 7.772   |
|                   |                 | LW       | EWB      | MIN      | AWP             | 0.024        | 0.0027 | 8.815   |
|                   |                 | DU       | MG       | MIN      | AWP             | 0.005        | 0.0031 | 1.658   |
|                   |                 | LW       | MG       | MIN      | AWP             | 0.007        | 0.0029 | 2.325   |
|                   |                 | DU       | MG       | HT       | AWP             | 0.013        | 0.0029 | 4.630   |
|                   |                 | DU       | MG       | BS       | AWP             | 0.031        | 0.0025 | 12.525  |
|                   |                 | DU       | MG       | YNT      | AWP             | 0.022        | 0.0024 | 9.197   |
|                   |                 | DU       | MG       | WZS      | AWP             | 0.041        | 0.0030 | 13.683  |
|                   |                 | LW       | MG       | HT       | AWP             | 0.014        | 0.0024 | 5.820   |
|                   |                 | LW       | MG       | BS       | AWP             | 0.026        | 0.0022 | 11.700  |
|                   |                 | LW       | MG       | YNT      | AWP             | 0.029        | 0.0021 | 14.196  |
|                   |                 | LW       | MG       | WZS      | AWP             | 0.050        | 0.0026 | 18.917  |
|                   | Europe -> HT    | LW       | DU       | HT       | AWP             | 0.001        | 0.0025 | 0.468   |
|                   |                 | HT       | BAM      | DU       | AWP             | 0.014        | 0.0028 | 5.141   |
|                   |                 | HT       | BAM      | LW       | AWP             | 0.005        | 0.0027 | 1.691   |
|                   | Europe -> YNT   | LW       | DU       | YNT      | AWP             | 0.008        | 0.0021 | 3.683   |
|                   |                 | YNT      | LUC      | DU       | AWP             | 0.006        | 0.0020 | 3.091   |
|                   |                 | YNT      | LUC      | LW       | AWP             | 0.006        | 0.0020 | 2.835   |
|                   | Europe -> WZS   | LW       | DU       | WZS      | AWP             | 0.010        | 0.0026 | 3.583   |
|                   |                 | WZS      | LUC      | DU       | AWP             | 0.013        | 0.0019 | 6.515   |
|                   |                 | WZS      | LUC      | LW       | AWP             | 0.013        | 0.0019 | 7.106   |
|                   | recent DU -> BS | DU       | LW       | BS       | AWP             | 0.011        | 0.0021 | 5.209   |
|                   |                 | BS       | YNT      | EWB      | AWP             | 0.003        | 0.0019 | 1.519   |
|                   |                 | BS       | YNT      | DU       | AWP             | 0.012        | 0.0021 | 5.390   |
|                   |                 | BS       | YNT      | LW       | AWP             | 0.001        | 0.0017 | 0.845   |
|                   | Cr -> LWU       | LWU      | WZS      | Cr       | AWP             | 0.067        | 0.0034 | 19.664  |
|                   |                 | LWU      | EHL      | Cr       | AWP             | 0.039        | 0.0030 | 13.046  |

|                   |               |     |     |     |       |        |        |        |
|-------------------|---------------|-----|-----|-----|-------|--------|--------|--------|
|                   |               | LWU | YNT | Cr  | AWP   | 0.069  | 0.0029 | 24.024 |
| Asia -> Europe    | BMX -> Europe | BMX | LUC | LW  | AWP   | 0.008  | 0.0019 | 4.040  |
|                   |               | BMX | LUC | DU  | AWP   | 0.004  | 0.0019 | 2.137  |
|                   |               | BMX | LUC | WDU | AWP   | 0.007  | 0.0018 | 3.790  |
|                   |               | BMX | LUC | PT  | AWP   | 0.008  | 0.0019 | 4.371  |
|                   | EHL -> Europe | EHL | JH  | LW  | AWP   | 0.019  | 0.0019 | 9.527  |
|                   |               | EHL | JH  | DU  | AWP   | 0.019  | 0.0020 | 9.702  |
|                   |               | EHL | JH  | WDU | AWP   | 0.019  | 0.0019 | 10.147 |
|                   |               | EHL | JH  | PT  | AWP   | 0.019  | 0.0020 | 9.701  |
| SWB -> Asia       | WZS           | MIN | SWB | AWP | 0.018 | 0.0021 | 8.796  |        |
|                   | LUC           | MIN | SWB | AWP | 0.018 | 0.0023 | 7.974  |        |
|                   | BMX           | MIN | SWB | AWP | 0.017 | 0.0022 | 7.681  |        |
|                   | BS            | MIN | SWB | AWP | 0.013 | 0.0020 | 6.345  |        |
|                   | YNT           | MIN | SWB | AWP | 0.013 | 0.0018 | 7.321  |        |
|                   | SCT           | MIN | SWB | AWP | 0.014 | 0.0020 | 7.117  |        |
| JWP <- SWB -> SCW | HT            | DU  | JWP | AWP | 0.017 | 0.0027 | 6.027  |        |
|                   | MIN           | DU  | JWP | AWP | 0.018 | 0.0031 | 5.843  |        |
|                   | BAM           | DU  | JWP | AWP | 0.023 | 0.0030 | 7.705  |        |
|                   | LWU           | DU  | JWP | AWP | 0.015 | 0.0031 | 4.819  |        |
|                   | EHL           | DU  | JWP | AWP | 0.020 | 0.0028 | 7.196  |        |
|                   | JH            | DU  | JWP | AWP | 0.018 | 0.0031 | 5.828  |        |
|                   | BS            | DU  | JWP | AWP | 0.024 | 0.0029 | 8.399  |        |
|                   | NJ            | DU  | JWP | AWP | 0.025 | 0.0029 | 8.653  |        |
|                   | SCT           | DU  | JWP | AWP | 0.026 | 0.0029 | 9.043  |        |
|                   | YNT           | DU  | JWP | AWP | 0.025 | 0.0026 | 9.650  |        |
|                   | LUC           | DU  | JWP | AWP | 0.025 | 0.0031 | 8.139  |        |
|                   | WZS           | DU  | JWP | AWP | 0.024 | 0.0028 | 8.351  |        |
|                   | BMX           | DU  | JWP | AWP | 0.023 | 0.0028 | 8.226  |        |
|                   | SCW           | DU  | JWP | AWP | 0.024 | 0.0028 | 8.474  |        |
|                   | HT            | EWB | JWP | AWP | 0.019 | 0.0029 | 6.807  |        |
|                   | MIN           | EWB | JWP | AWP | 0.021 | 0.0031 | 6.820  |        |
|                   | BAM           | EWB | JWP | AWP | 0.026 | 0.0029 | 8.989  |        |
|                   | LWU           | EWB | JWP | AWP | 0.018 | 0.0032 | 5.695  |        |
|                   | EHL           | EWB | JWP | AWP | 0.023 | 0.0028 | 8.150  |        |
|                   | JH            | EWB | JWP | AWP | 0.021 | 0.0032 | 6.615  |        |
|                   | BS            | EWB | JWP | AWP | 0.027 | 0.0029 | 9.154  |        |
|                   | NJ            | EWB | JWP | AWP | 0.028 | 0.0030 | 9.374  |        |
|                   | SCT           | EWB | JWP | AWP | 0.029 | 0.0028 | 10.298 |        |
|                   | YNT           | EWB | JWP | AWP | 0.028 | 0.0027 | 10.543 |        |
|                   | LUC           | EWB | JWP | AWP | 0.028 | 0.0032 | 8.526  |        |
|                   | WZS           | EWB | JWP | AWP | 0.026 | 0.0029 | 8.923  |        |
|                   | BMX           | EWB | JWP | AWP | 0.026 | 0.0029 | 8.749  |        |

|  |     |     |     |     |       |        |       |
|--|-----|-----|-----|-----|-------|--------|-------|
|  | SCW | EWB | JWP | AWP | 0.026 | 0.0028 | 9.552 |
|  | HT  | MG  | JWP | AWP | 0.016 | 0.0030 | 5.383 |
|  | MIN | MG  | JWP | AWP | 0.018 | 0.0031 | 5.645 |
|  | BAM | MG  | JWP | AWP | 0.022 | 0.0030 | 7.438 |
|  | LWU | MG  | JWP | AWP | 0.015 | 0.0032 | 4.536 |
|  | EHL | MG  | JWP | AWP | 0.019 | 0.0029 | 6.747 |
|  | JH  | MG  | JWP | AWP | 0.018 | 0.0032 | 5.417 |
|  | BS  | MG  | JWP | AWP | 0.023 | 0.0030 | 7.710 |
|  | NJ  | MG  | JWP | AWP | 0.025 | 0.0030 | 8.034 |
|  | SCT | MG  | JWP | AWP | 0.025 | 0.0029 | 8.653 |
|  | YNT | MG  | JWP | AWP | 0.025 | 0.0028 | 8.898 |
|  | LUC | MG  | JWP | AWP | 0.024 | 0.0032 | 7.506 |
|  | WZS | MG  | JWP | AWP | 0.022 | 0.0030 | 7.529 |
|  | BMX | MG  | JWP | AWP | 0.022 | 0.0031 | 7.272 |
|  | SCW | MG  | JWP | AWP | 0.023 | 0.0029 | 7.788 |

NOTE.—See supplementary table S1 for the full names of the population codes.

470

471

472

473 **Supplementary Table S5.** Comparison of nucleotide diversity on autosomes and in the

474 MSY region.

|              | Pi<br>(Chinese pigs<br>with Asian<br>haplotypes) | Pi<br>(Chinese pigs with<br>European<br>haplotypes) | Pi<br>(European pigs with<br>European<br>haplotypes) |
|--------------|--------------------------------------------------|-----------------------------------------------------|------------------------------------------------------|
| Autosome     | $3.67 \times 10^{-3}$                            | $3.66 \times 10^{-3}$                               | $2.36 \times 10^{-3}$                                |
| MSY          | $1.18 \times 10^{-4}$                            | $2.97 \times 10^{-5}$                               | $5.00 \times 10^{-5}$                                |
| MSY:Autosome | 1:31                                             | 1:123                                               | 1:47                                                 |

475

476

477 **Supplementary Table S6.** Higher than expected frequency of European Y  
 478 chromosomes in Asian pig populations. P values are calculated using a binomial test  
 479 over the range of expected Y chromosome frequencies. Even when all contributions  
 480 from Europe are male, HT&MIN, WZS, and BS have higher than expected European  
 481 Y chromosome frequencies. In contrast, the lack of European mitochondria is consistent  
 482 with expectations.

| Population | Mean X-chromosomal ancestry | Mean autosomal ancestry | <i>p</i> value range, mtDNA<br>(number of European haplotypes/sample size) | <i>p</i> value range, Y chr<br>(number of European haplotypes/sample size) |
|------------|-----------------------------|-------------------------|----------------------------------------------------------------------------|----------------------------------------------------------------------------|
| HT&MIN     | 0.16                        | 0.20                    | 0.002-1 (0/12)                                                             | 0-0.022 (6/7)                                                              |
| WZS        | 0.043                       | 0.078                   | 0.35-1 (0/6)                                                               | 0-0.026 (2/2)                                                              |
| YNT        | 0.021                       | 0.045                   | 0.32-1 (0/12)                                                              | 0-0.68 (1/12)                                                              |
| BS         | 0.025                       | 0.074                   | 0.38-1 (0/6)                                                               | 0-0.0034 (3/3)                                                             |

483  
 484

485 **Supplementary Table S7.** The parameters of the best-fitted demographic models of  
 486 the target pairs of European and Chinese pig populations.

| population pairs | s1       | t1       | nu11     | nu12     | m1_12    | m1_21    | t2       | nu21     | nu22     | m2_12    | m2_21    | Nanc      | Log likelihood |
|------------------|----------|----------|----------|----------|----------|----------|----------|----------|----------|----------|----------|-----------|----------------|
| MIN&HT_<br>LW&MG | 3.51E-01 | 5.13E-01 | 7.28E-01 | 1.78E-01 | 3.49E-01 | 2.60E+00 | 3.62E-02 | 2.67E-02 | 6.75E-02 | 6.75E+00 | 3.28E+00 | 91137.07  | -1220.06       |
| BS_WDU           | 9.48E-01 | 2.52E-01 | 5.66E-01 | 1.69E-01 | 2.70E-13 | 1.71E+00 | 1.90E-02 | 3.92E-01 | 1.82E-02 | 2.45E+00 | 3.19E+00 | 180007.45 | -543.77        |
| WZS_LW           | 5.02E-01 | 6.08E-01 | 9.47E-01 | 1.66E-01 | 2.25E-01 | 1.16E+00 | 1.30E-01 | 3.29E-01 | 6.56E-02 | 8.93E-01 | 5.21E+00 | 86643.27  | -681.80        |
| YNT_LW           | 3.74E-01 | 6.60E-01 | 1.21E+00 | 2.31E-01 | 2.90E-04 | 1.95E+00 | 1.13E-01 | 2.18E-01 | 7.65E-02 | 1.61E+00 | 3.52E+00 | 84721.51  | 1223.32        |

487  
 488  
 489  
 490

491 **Supplementary Table S8.** The possibility of the simulated European Y frequency in  
 492 Chinese pigs that match observed frequency in Chinese pigs.

| population pairs | number of simulation repeats | number of simulations that match the observed data | <i>p</i> -value |
|------------------|------------------------------|----------------------------------------------------|-----------------|
| MIN&HT_LW&MG     | 1000                         | 38                                                 | 0.038           |
| BS_WDU           | 1000                         | 3                                                  | 0.003           |
| WZS_LW           | 1000                         | 209                                                | 0.209           |
| YNT_LW           | 1000                         | 89                                                 | 0.089           |

493

494 **Supplementary Table S9.** The geographical distribution of the two haplogroups in a large panel of 426 male pigs from around the globe.

| Full_breed_name | Abbreviation | WildorDomesticType | Country | Location            | Longitude | Latitude | Number | Asian haplogroup | European haplogroup | Sumatran haplotype |
|-----------------|--------------|--------------------|---------|---------------------|-----------|----------|--------|------------------|---------------------|--------------------|
| Hanjianghei     | HJH          | Domestic           | China   | Shanxi_Hanzhong     | 106.66    | 33.24    | 1      | 1                | 0                   | 0                  |
| Ningxiang       | NX           | Domestic           | China   | Hunan_Ningxiang     | 112.36    | 28.13    | 1      | 1                | 0                   | 0                  |
| Yushanhei       | YSH          | Domestic           | China   | Jiangxi_Yushan      | 118.17    | 28.76    | 1      | 1                | 0                   | 0                  |
| Mi              | MI           | Domestic           | China   | Jiangsu_Changzhou   | 119.52    | 31.72    | 2      | 2                | 0                   | 0                  |
| Lepinghua       | LPH          | Domestic           | China   | Jiangxi_Leping      | 117.15    | 28.98    | 3      | 3                | 0                   | 0                  |
| Jinhua          | JH           | Domestic           | China   | Zhejiang_Jinhua     | 119.65    | 29.09    | 3      | 3                | 0                   | 0                  |
| TibetTibetan1   | TT1          | Domestic           | China   | Tibet_Gongbujiangda | 93.24     | 30.03    | 4      | 4                | 0                   | 0                  |
| Tongcheng       | TC           | Domestic           | China   | Hubei_Xianning      | 113.8     | 29.23    | 5      | 5                | 0                   | 0                  |
| Bamei           | BAM          | Domestic           | China   | Gansu_Longdong      | 107.63    | 35.75    | 6      | 6                | 0                   | 0                  |
| Meishan         | MS           | Domestic           | China   | China_Jiading       | 121.27    | 31.38    | 6      | 6                | 0                   | 0                  |
| Shaziling       | SZL          | Domestic           | China   | Hunan_Xiangtan      | 112.91    | 27.87    | 7      | 7                | 0                   | 0                  |
| Neijiang        | NJ           | Domestic           | China   | Sichuan_Neijiang    | 104.85    | 29.81    | 8      | 8                | 0                   | 0                  |
| Rongchang       | RC           | Domestic           | China   | Chongqing_Rongchang | 106.21    | 29.62    | 8      | 8                | 0                   | 0                  |
| Ganxi           | GX           | Domestic           | China   | Jiangxi_Shanggao    | 114.86    | 28.2     | 8      | 8                | 0                   | 0                  |
| SichuanTibetan  | SCT          | Domestic           | China   | Sichuan_Litang      | 100.28    | 30       | 10     | 10               | 0                   | 0                  |
| Congjiangxiang  | CJX          | Domestic           | China   | Guizhou_Congjiang   | 108.54    | 25.35    | 11     | 11               | 0                   | 0                  |
| Laiwu           | LWU          | Domestic           | China   | Shandong_Laiwu      | 117.67    | 36.22    | 11     | 11               | 0                   | 0                  |
| Diannan         | DN           | Domestic           | China   | Yunan_Xishuangbanna | 101       | 21.5     | 14     | 14               | 0                   | 0                  |
| Dongshan        | DS           | Domestic           | China   | Guangxi_Quanzhou    | 111.08    | 25.94    | 14     | 14               | 0                   | 0                  |
| Daweizi         | DWZ          | Domestic           | China   | Hunan_Changsha      | 113.22    | 28.32    | 15     | 15               | 0                   | 0                  |
| Erhualian       | EHL          | Domestic           | China   | Jiangsu_Jiaoxi      | 119.93    | 31.72    | 15     | 15               | 0                   | 0                  |
| Bamaxiang       | BMX          | Domestic           | China   | Guangxi_Bama        | 107.25    | 24.15    | 15     | 15               | 0                   | 0                  |

|                       |      |          |        |                      |        |       |    |    |    |   |
|-----------------------|------|----------|--------|----------------------|--------|-------|----|----|----|---|
| SouthChineseWildBoar  | SCWB | WildBoar | China  | China_Shangyou       | 114.55 | 25.8  | 1  | 1  | 0  | 0 |
| SouthChineseWildBoar  | SCWB | WildBoar | China  | China_Wuyishan       | 117    | 27.93 | 1  | 1  | 0  | 0 |
| CenterChineseWildBoar | CCWB | WildBoar | China  | China_Funiushan      | 111.82 | 33.87 | 1  | 1  | 0  | 0 |
| NorthChineseWildBoar  | NCWB | WildBoar | China  | China_North          | 128.07 | 44.36 | 1  | 1  | 0  | 0 |
| ChineseWildboar       | CWB  | WildBoar | China  | China                | 114.35 | 37.35 | 1  | 1  | 0  | 0 |
| SouthChineseWildBoar  | SCWB | WildBoar | China  | China_Xiangshan      | 119.73 | 29.48 | 2  | 2  | 0  | 0 |
| SouthChineseWildBoar  | SCWB | WildBoar | China  | China_Nanchang       | 115.89 | 28.85 | 7  | 7  | 0  | 0 |
| KoreanWildBoar        | KWB  | WildBoar | Korea  | Korea                | 128.52 | 37.94 | 6  | 6  | 0  | 0 |
| Khabarovsk            | KBR  | WildBoar | Russia | Russia_Khabarovsk    | 135.07 | 48.51 | 1  | 1  | 0  | 0 |
| PrimoskyWildBoar      | RPWB | WildBoar | Russia | Russia_Primosky      | 135    | 48.72 | 8  | 8  | 0  | 0 |
| Qingping              | QP   | Domestic | China  | Hubei_Dangyang       | 112.41 | 31.21 | 2  | 1  | 1  | 0 |
| Hetao                 | HT   | Domestic | China  | Inner_Mongolia_Hetao | 107.42 | 40.75 | 3  | 2  | 1  | 0 |
| TibetTibetan2         | TT2  | Domestic | China  | Tibet_Milin          | 94.22  | 29.22 | 5  | 4  | 1  | 0 |
| YunnanTibetan         | YNT  | Domestic | China  | Yunan_Diqing         | 99.71  | 27.83 | 12 | 11 | 1  | 0 |
| GansuTibetan          | GST  | Domestic | China  | Gansu_Hezuo          | 102.91 | 35    | 6  | 1  | 5  | 0 |
| Dahe                  | DH   | Domestic | China  | Yunan_Fuyuan         | 104.37 | 25.47 | 7  | 4  | 3  | 0 |
| Mingguang             | MG   | Domestic | China  | Yunan_Tengchong      | 98.5   | 25.02 | 15 | 8  | 7  | 0 |
| Xiangxihei            | XXH  | Domestic | China  | Hunan_Luxi           | 110.22 | 28.22 | 14 | 4  | 10 | 0 |
| Putianhei             | PTH  | Domestic | China  | Fujian_Putian        | 118.94 | 25.5  | 1  | 0  | 1  | 0 |
| Tunchang              | TUN  | Domestic | China  | Hainan_Tunchang      | 110.06 | 19.35 | 1  | 0  | 1  | 0 |
| Xu                    | XU   | Domestic | China  | Anhui_Nanling        | 118.29 | 30.9  | 1  | 0  | 1  | 0 |
| Huai                  | HUAI | Domestic | China  | Jiangsu_Donghai      | 118.79 | 34.56 | 2  | 0  | 2  | 0 |
| Dahuabai              | DHB  | Domestic | China  | Guangdong_Zhongshan  | 113.42 | 22.55 | 8  | 0  | 8  | 0 |
| Wuzhishan             | WZS  | Domestic | China  | Hainan_Wuzhishan     | 109.52 | 18.78 | 8  | 0  | 8  | 0 |
| Min                   | MIN  | Domestic | China  | Northeast_China      | 126.28 | 46.27 | 9  | 0  | 9  | 0 |

|                          |      |          |             |                        |        |       |    |   |    |   |
|--------------------------|------|----------|-------------|------------------------|--------|-------|----|---|----|---|
| Mashen                   | MAS  | Domestic | China       | Shanxi_Datong          | 113.29 | 40.11 | 13 | 0 | 13 | 0 |
| Iberian                  | IB   | Domestic | Europe      | Spain_IberianPeninsula | -4.09  | 40.49 | 1  | 0 | 1  | 0 |
| Semirechensk             | SEM  | Domestic | Kazakhstan  | Kazakhstan_Southeast   | 66.92  | 48.02 | 1  | 0 | 1  | 0 |
| Hampshire                | HPS  | Domestic | America     | America_Kentucky       | -84.27 | 37.85 | 2  | 0 | 2  | 0 |
| Ukrainian white-steppe   | UWS  | Domestic | Ukraine     | Ukraine_AskainaNova    | 32.31  | 48.23 | 2  | 0 | 2  | 0 |
| Minisib                  | MSB  | Domestic | Russia      | Russia_Novosibirsk     | 82.94  | 55.01 | 2  | 0 | 2  | 0 |
| Mangalica                | MGL  | Domestic | Europe      | Hungary                | 19.5   | 47.16 | 3  | 0 | 3  | 0 |
| Ukrainian spotted steppe | USS  | Domestic | Ukraine     | Ukraine_AskainaNova    | 32.31  | 48.23 | 3  | 0 | 3  | 0 |
| Belorussian pork swine   | BPS  | Domestic | Belorussia  | Belorussia             | 27.95  | 53.71 | 5  | 0 | 5  | 0 |
| WhiteDuroc               | WD   | Domestic | America     | America_Southburn      | -86.61 | 36.33 | 6  | 0 | 6  | 0 |
| Pietrain                 | PI   | Domestic | Europe      | Belgium_Piétrain       | 4.92   | 50.72 | 7  | 0 | 7  | 0 |
| Red White Belted         | RWB  | Domestic | Ukraine     | Ukraine_Nikolaev       | 32.39  | 49.44 | 7  | 0 | 7  | 0 |
| Yorkshire                | LW   | Domestic | Europe      | England_Yorkshire      | -1.76  | 53.81 | 15 | 0 | 15 | 0 |
| Landrace                 | LR   | Domestic | Europe      | Denmark                | 9.5    | 56.26 | 18 | 0 | 18 | 0 |
| Duroc                    | DRC  | Domestic | America     | America_NewEngland     | -70.78 | 44.1  | 18 | 0 | 18 | 0 |
| EuropeanWildboar         | EWB  | WildBoar | Greece      | Greece_Samos           | 26.98  | 37.76 | 1  | 0 | 1  | 0 |
| EuropeanWildboar         | EWB  | WildBoar | Spain       | Spain_Northeast        | 16.97  | 45.63 | 1  | 0 | 1  | 0 |
| EuropeanWildboar         | EWB  | WildBoar | France      | France                 | 2.21   | 46.23 | 1  | 0 | 1  | 0 |
| EuropeanWildboar         | EWB  | WildBoar | Switzerland | Switzerland_Malcantone | 10.09  | 47.82 | 1  | 0 | 1  | 0 |
| Ivanovo                  | IVA  | WildBoar | Russia      | Russia_Ivanovo         | 40.98  | 57.01 | 1  | 0 | 1  | 0 |
| Kirov                    | KIR  | WildBoar | Russia      | Russia_Kirov           | 49.67  | 58.61 | 1  | 0 | 1  | 0 |
| Krasnodar                | KSD  | WildBoar | Russia      | Russia_Krasnodar       | 38.99  | 45.04 | 1  | 0 | 1  | 0 |
| Leningrad                | LNG  | WildBoar | Russia      | Russia_Leningrad       | 30.34  | 59.94 | 1  | 0 | 1  | 0 |
| Omsk                     | OMSK | WildBoar | Russia      | Russia_Omsk            | 73.32  | 54.99 | 1  | 0 | 1  | 0 |
| Saratov                  | SRT  | WildBoar | Russia      | Russia_Saratov         | 45.96  | 51.6  | 1  | 0 | 1  | 0 |



|                  |      |          |             |                    |        |       |   |   |   |   |
|------------------|------|----------|-------------|--------------------|--------|-------|---|---|---|---|
| Tver             | TVER | WildBoar | Russia      | Russia_Tver        | 35.92  | 56.86 | 1 | 0 | 1 | 0 |
| Vladimir         | VDM  | WildBoar | Russia      | Russia_Vladimir    | 40.42  | 56.15 | 1 | 0 | 1 | 0 |
| EuropeanWildboar | EWB  | WildBoar | Netherlands | Netherlands_Veluwe | 5.83   | 52.24 | 2 | 0 | 2 | 0 |
| Cheliabinsk      | CLB  | WildBoar | Russia      | Russia_Cheliabinsk | 61.44  | 55.17 | 2 | 0 | 2 | 0 |
| Kharkov          | KK   | WildBoar | Ukraine     | Ukraine_Kharkov    | 36.23  | 50    | 2 | 0 | 2 | 0 |
| Tumen            | TUM  | WildBoar | Russia      | Russia_Tumen       | 65.53  | 57.17 | 2 | 0 | 2 | 0 |
| Volgograd        | VGG  | WildBoar | Russia      | Russia_Volgograd   | 44.51  | 48.71 | 2 | 0 | 2 | 0 |
| Arhangelsk       | ARH  | WildBoar | Russia      | Russia_Arhangelsk  | 40.56  | 64.55 | 3 | 0 | 3 | 0 |
| Kurgan           | KGN  | WildBoar | Russia      | Russia_Kurgan      | 65.31  | 55.47 | 3 | 0 | 3 | 0 |
| Smolensk         | SML  | WildBoar | Russia      | Russia_Smolensk    | 32.05  | 54.79 | 3 | 0 | 3 | 0 |
| SumatranWildBoar | SWB  | WildBoar | Indonesia   | Indonesia_Sumatra  | 101.34 | -0.58 | 1 | 0 | 0 | 1 |

495

**Supplementary Table S10.** 44 Models tested by jModeltest for the build 11.1 Y

chromosome.

| Model    | -lnL       | K   | AIC        | delta     | weight   | cumWeight |
|----------|------------|-----|------------|-----------|----------|-----------|
| TVM      | 21735.9018 | 211 | 43893.8036 | 0.0000    | 0.4295   | 0.4295    |
| GTR      | 21735.9015 | 212 | 43895.8030 | 1.9994    | 0.1581   | 0.5876    |
| TVM+G    | 21735.9035 | 212 | 43895.8071 | 2.0034    | 0.1577   | 0.7453    |
| GTR+G    | 21735.9033 | 213 | 43897.8065 | 4.0029    | 0.0580   | 0.9090    |
| TVMef    | 21742.8090 | 208 | 43901.6181 | 7.8144    | 8.63E-03 | 0.9565    |
| TPM1uf   | 21741.8178 | 209 | 43901.6356 | 7.8319    | 8.56E-03 | 0.9651    |
| TPM3uf   | 21742.3804 | 209 | 43902.7608 | 8.9571    | 4.88E-03 | 0.9700    |
| SYM      | 21742.6264 | 209 | 43903.2527 | 9.4491    | 3.81E-03 | 0.9738    |
| TVMef+G  | 21742.8108 | 209 | 43903.6215 | 9.8179    | 3.17E-03 | 0.9769    |
| TIM1     | 21741.8178 | 210 | 43903.6356 | 9.8319    | 3.15E-03 | 0.9801    |
| TPM1uf+G | 21741.8195 | 210 | 43903.6389 | 9.8353    | 3.14E-03 | 0.9832    |
| TIM3     | 21742.3798 | 210 | 43904.7597 | 10.9560   | 1.79E-03 | 0.9893    |
| TPM3uf+G | 21742.3821 | 210 | 43904.7642 | 10.9606   | 1.79E-03 | 0.9910    |
| SYM+G    | 21742.6281 | 210 | 43905.2563 | 11.4526   | 1.40E-03 | 0.9924    |
| TIM1+G   | 21741.8195 | 211 | 43905.6389 | 11.8353   | 1.16E-03 | 0.9948    |
| TIM3+G   | 21742.3815 | 211 | 43906.7630 | 12.9593   | 6.59E-04 | 0.9972    |
| TPM1     | 21747.5650 | 206 | 43907.1301 | 13.3264   | 5.48E-04 | 0.9977    |
| TPM3     | 21748.2092 | 206 | 43908.4183 | 14.6147   | 2.88E-04 | 0.9985    |
| TIM1ef   | 21747.3814 | 207 | 43908.7628 | 14.9592   | 2.42E-04 | 0.9987    |
| TPM1+G   | 21747.5668 | 207 | 43909.1335 | 15.3299   | 2.01E-04 | 0.9989    |
| TIM3ef   | 21748.0285 | 207 | 43910.0569 | 16.2533   | 1.27E-04 | 0.9992    |
| TPM2uf   | 21746.1517 | 209 | 43910.3033 | 16.4997   | 1.12E-04 | 0.9993    |
| TPM3+G   | 21748.2109 | 207 | 43910.4218 | 16.6182   | 1.06E-04 | 0.9994    |
| TIM1ef+G | 21747.3831 | 208 | 43910.7662 | 16.9626   | 8.90E-05 | 0.9995    |
| HKY      | 21747.5741 | 208 | 43911.1482 | 17.3445   | 7.36E-05 | 0.9995    |
| TIM3ef+G | 21748.0302 | 208 | 43912.0604 | 18.2568   | 4.66E-05 | 0.9997    |
| TIM2     | 21746.1517 | 210 | 43912.3034 | 18.4998   | 4.13E-05 | 0.9998    |
| TPM2uf+G | 21746.1534 | 210 | 43912.3068 | 18.5032   | 4.12E-05 | 0.9998    |
| TrN      | 21747.5741 | 209 | 43913.1482 | 19.3446   | 2.71E-05 | 0.9999    |
| HKY+G    | 21747.5758 | 209 | 43913.1516 | 19.3479   | 2.70E-05 | 0.9999    |
| TIM2+G   | 21746.1534 | 211 | 43914.3068 | 20.5031   | 1.52E-05 | 0.9999    |
| TrN+G    | 21747.5758 | 210 | 43915.1515 | 21.3479   | 9.94E-06 | 1.0000    |
| K80      | 21752.9698 | 205 | 43915.9396 | 22.1359   | 6.70E-06 | 1.0000    |
| TPM2     | 21752.4640 | 206 | 43916.9280 | 23.1244   | 4.09E-06 | 1.0000    |
| TrNef    | 21752.7853 | 206 | 43917.5706 | 23.7669   | 2.97E-06 | 1.0000    |
| K80+G    | 21752.9715 | 206 | 43917.9429 | 24.1393   | 2.46E-06 | 1.0000    |
| TIM2ef   | 21752.2754 | 207 | 43918.5508 | 24.7472   | 1.82E-06 | 1.0000    |
| TPM2+G   | 21752.4657 | 207 | 43918.9314 | 25.1278   | 1.50E-06 | 1.0000    |
| TrNef+G  | 21752.7870 | 207 | 43919.5740 | 25.7704   | 1.09E-06 | 1.0000    |
| TIM2ef+G | 21752.2772 | 208 | 43920.5544 | 26.7508   | 6.67E-07 | 1.0000    |
| JC       | 22597.8019 | 204 | 45603.6037 | 1709.8001 | 0.00E+00 | 1.0000    |

|       |            |     |            |           |          |        |
|-------|------------|-----|------------|-----------|----------|--------|
| F81   | 22595.3073 | 207 | 45604.6146 | 1710.8109 | 0.00E+00 | 1.0000 |
| JC+G  | 22597.8024 | 205 | 45605.6048 | 1711.8012 | 0.00E+00 | 1.0000 |
| F81+G | 22595.3079 | 208 | 45606.6157 | 1712.8121 | 0.00E+00 | 1.0000 |

496

497

498 **Supplementary Table S11.** Estimates of the TMRCA of phylogenetic nodes of

499 particular interest using the MSY sequence via BEAST when divergence time estimates

500 of *Sus verucosus* (JVWP) and *Sus scrofa* was set as 4.2 million years ago.

| Node                                                            | Estimate of T <sub>MRC</sub> A<br>(Thousand years) | 95% highest posterior density (HPD)<br>interval |
|-----------------------------------------------------------------|----------------------------------------------------|-------------------------------------------------|
| All <i>Sus scrofa</i>                                           | 1253                                               | 1220-1287                                       |
| Sumatran wild boars and<br>Chinese pigs with Asian<br>haplotype | 703                                                | 633-767                                         |
| All pigs with Asian<br>haplotypes                               | 133                                                | 128-139                                         |
| All pigs with European<br>haplotypes                            | 113                                                | 108-120                                         |
| Chinese pigs with European<br>haplotypes                        | 25                                                 | 23-27                                           |
| Hetao pig and Large White                                       | 1.1                                                | 0.7-1.6                                         |
| Min pig and SwallowBelly<br>Manglica                            | 0.9                                                | 0.6-1.3                                         |
| Yunnan Tibetan pig and<br>Large White                           | 0.6                                                | 0.3-0.9                                         |
| Wuzhishan pig and Large<br>White                                | 0.5                                                | 0.3-0.8                                         |
| Baoshan pig and White Duroc                                     | 0.3                                                | 0.1-0.4                                         |

501

502

503

504 **Supplementary Table S12.** Estimates of the TMRCA of phylogenetic nodes of  
 505 particular interest using the MSY sequence via BEAST when divergence time estimates  
 506 of *Sus verucosus* (JVWP) and *Sus scrofa* was set as 1.36 million years ago.

| Node                                                            | Estimate of $T_{MRCA}$<br>(Million years) | 95% highest posterior<br>density (HPD) interval |
|-----------------------------------------------------------------|-------------------------------------------|-------------------------------------------------|
| All <i>Sus scrofa</i>                                           | 0.225                                     | 0.192-0.231                                     |
| Sumatran wild boars<br>and Chinese pigs<br>with Asian haplotype | 0.216                                     | 0.189-0.223                                     |
| All pigs with Asian<br>haplotypes                               | 0.025                                     | 0.024-0.027                                     |
| All pigs with<br>European haplotypes                            | 0.022                                     | 0.020-0.023                                     |
| Chinese pigs with<br>European haplotypes                        | 0.007                                     | 0.006-0.008                                     |

507

508 **Supplementary Table S13.** Filter standard set as default options in the variant calling  
 509 of Platypus.

| Label      | Meaning                                                                                        | Filter  |
|------------|------------------------------------------------------------------------------------------------|---------|
| HapScore   | The calling window has multiple haplotypes                                                     | > 4     |
| strandBias | Variant fails strand-bias filter                                                               | < 0.001 |
| alleleBias | Variant fails allele-bias filter                                                               | < 0.001 |
| badReads   | Variant is supported only by low-quality reads                                                 | > 15    |
| Q20        | Variant call has low posterior Phred score                                                     | < 20    |
| MQ         | Variant call has low root mean square of mapping qualities of<br>reads at the variant position | < 40    |
| QD         | Ratio of variant quality to number of supporting reads is low                                  | < 10    |
| SC         | Sequence context surrounding variant has low complexity                                        | > 0.95  |
| PASS       | Variant passes all filters                                                                     |         |

510 **4. Supplementary Figures**

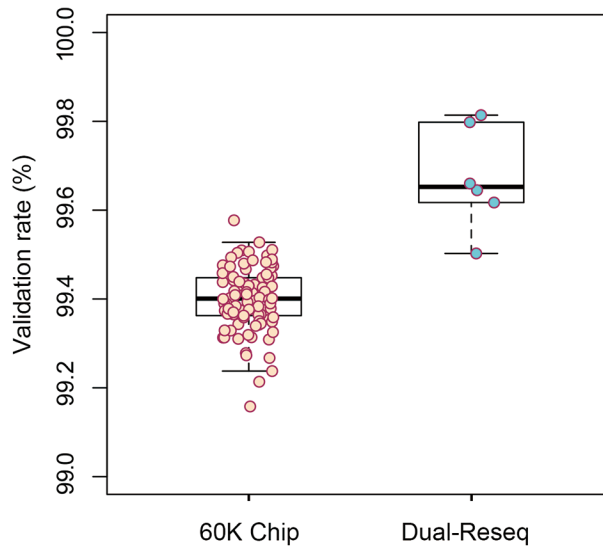

511

512 **Supplementary Figure S1. SNPs accuracy validation by the data of 60K chip array**  
513 **and dual-resequencing.** The boxplot labelled by 60K Chip means that 53,908  
514 polymorphic loci with same positions to the 60K chip array were extracted from our  
515 SNPs set of the 98 pigs with resequencing data and 60K chip array data simultaneously,  
516 and 99.4% of informative SNPs were consistent to the SNP genotypes from the 60K  
517 chip arrays. The boxplot labelled by Dual-Reseq means that six pigs were re-sequenced  
518 twice and called SNPs using Platypus, and 99.6% were consistent with the SNPs of  
519 their duplicate individuals.

520

521

522

523

524

525

526

527

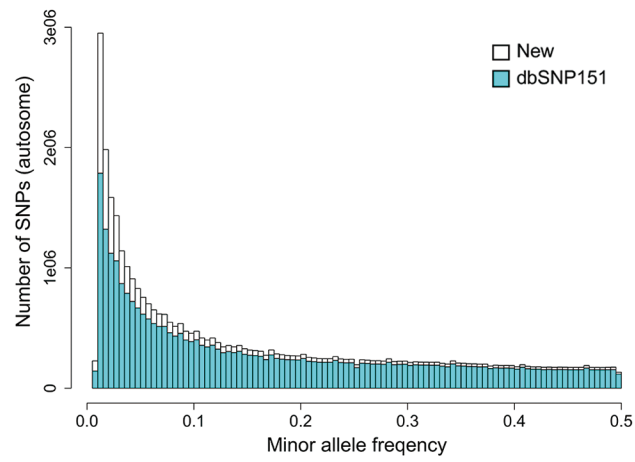

528

529 **Supplementary Figure S2. Autosomal SNP distribution of 200 Eurasian pigs.** Cyan

530 histogram indicates the distribution of SNPs shared with Build 151 of the *Sus scrofa*

531 dbSNP on the NCBI GenBank database. Blank parts indicate the novel SNPs identified

532 in this study.

533

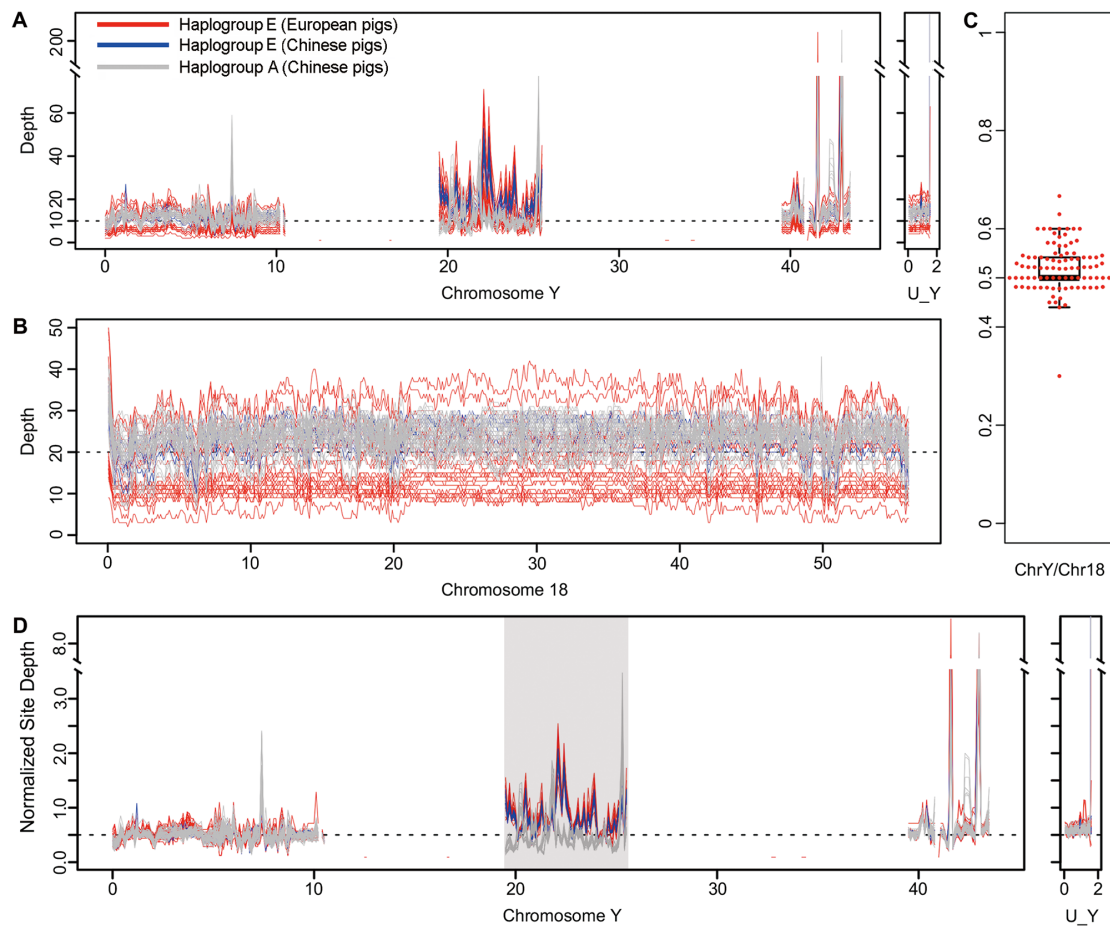

534

535 **Supplementary Figure S3. Depth distribution along the effective regions on the Y**  
 536 **chromosome and chromosome 18 of Eurasian pigs based on Build 11.1 reference**  
 537 **genome in a window size of 100 Kb with a step size of 50 Kb.** (A) The distribution  
 538 of depth along the effective regions on the Y. (B) The distribution of depth along  
 539 chromosome 18. (C) Boxplot of the ratio of (median) average depths of the Y and  
 540 chromosome 18 among Eurasian pigs. (D) The distribution of normalized depth along  
 541 the effective regions on the Y. The depth in each window of each individual is divided  
 542 by the average depth of whole chromosome 18 of that individual. Haplogroup E  
 543 (European pigs), Haplogroup E (Chinese pigs) and Haplogroup A (Chinese pigs) are  
 544 indicated by red, blue and grey, respectively. The grey background in **supplementary**  
 545 **fig. S3D** marks abnormally high depth in the PB interval (19.5Mb-25.5Mb) of  
 546 Haplogroup E.

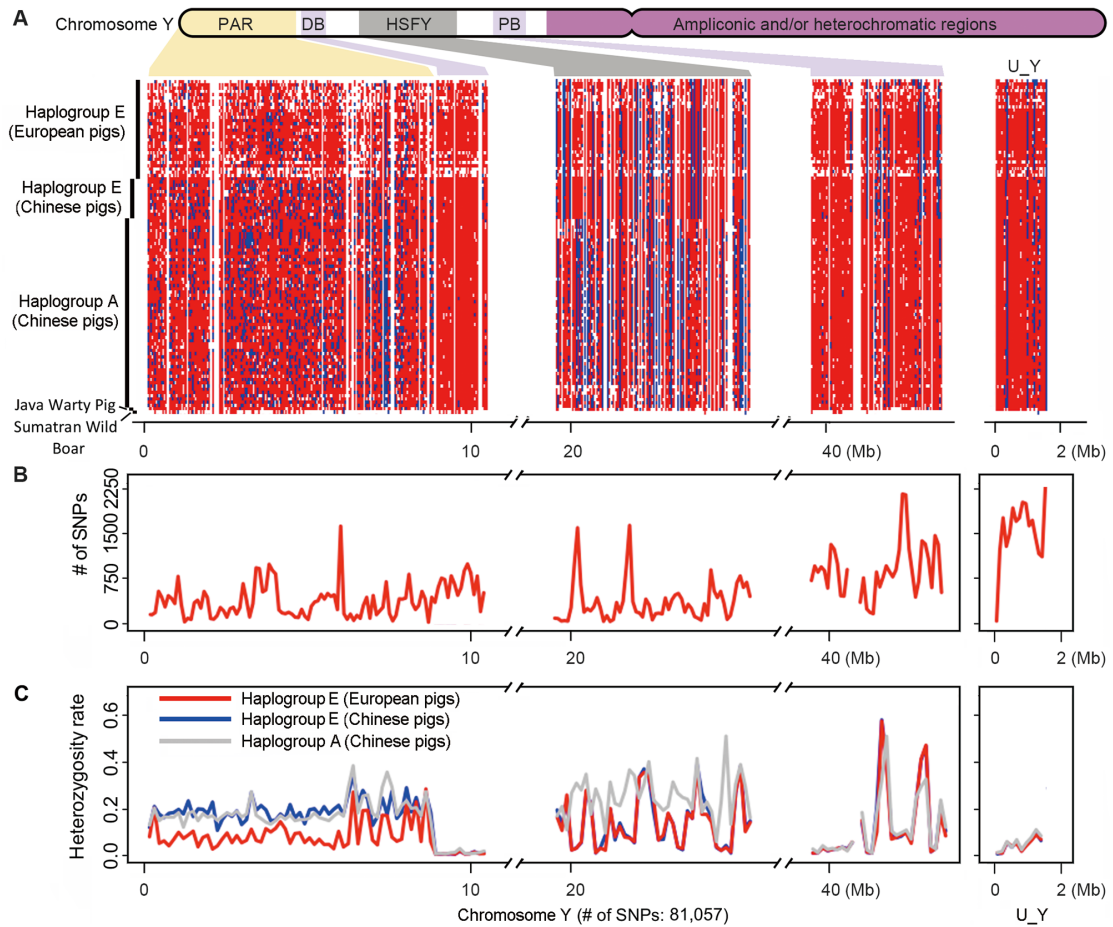

547

548 **Supplementary Figure S4. The pattern of heterozygous position distribution on**  
 549 **the Y chromosome derived from the initial called 81,057 SNPs among all male**  
 550 **individuals. (A) The distribution of heterozygous sites along the Y chromosome.**  
 551 **Alleles that are homozygous or heterozygous are indicated by red or blue, respectively.**  
 552 **(B) The pattern of SNPs distribution in a window size of 150 Kb along the Y**  
 553 **chromosome. (C) The distribution of heterozygosity rate in a window size of 150 Kb**  
 554 **along the Y chromosome among Eurasian pigs.**

555

556

557



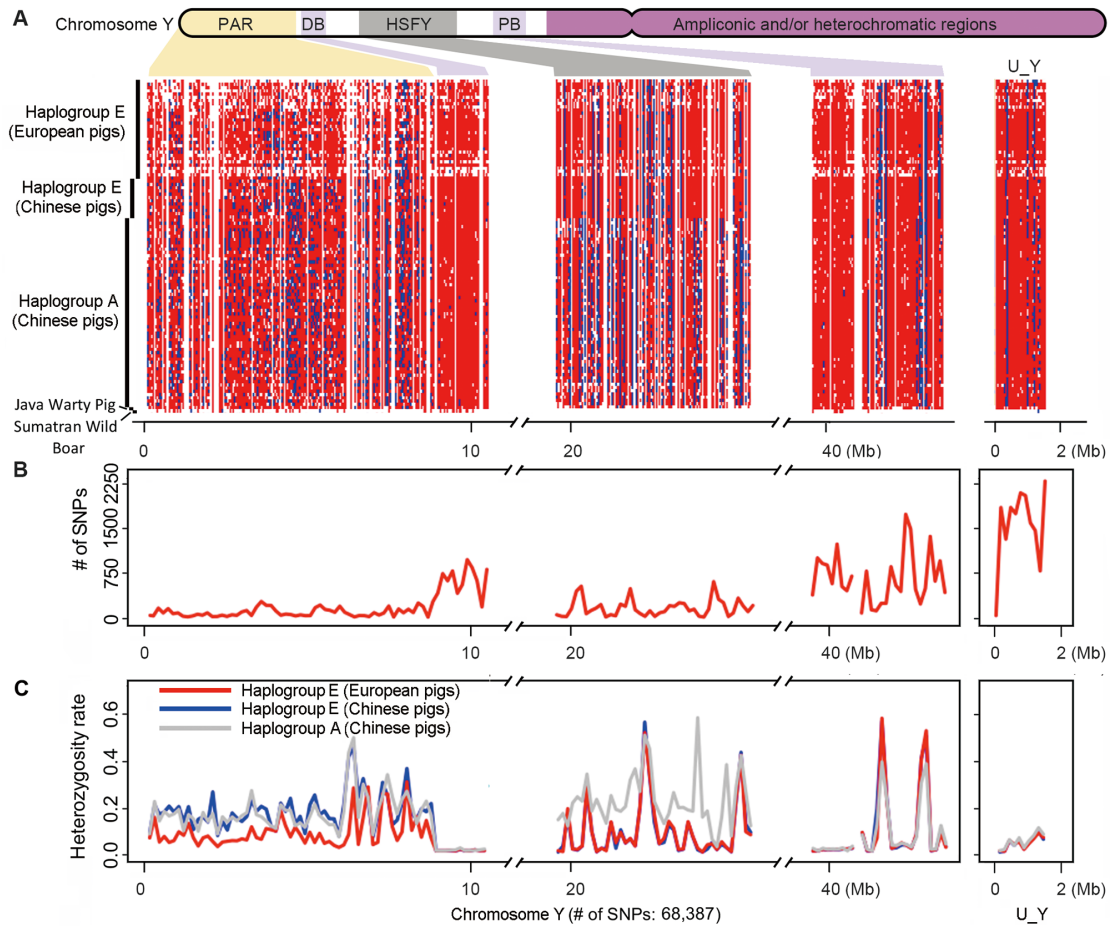

558

559 **Supplementary Figure S5. The pattern of heterozygous position distribution on**  
 560 **the Y chromosome derived from 68,387 SNPs after removing SNPs same as the**  
 561 **SNPs called by the reads of female individuals misaligned to Y chromosome**  
 562 **reference sequence among all male individuals. (A) The distribution of heterozygous**  
 563 **sites along the Y chromosome. Alleles that are homozygous or heterozygous are**  
 564 **indicated by red or blue, respectively. (B) The pattern of SNPs distribution in a window**  
 565 **size of 150 Kb along the Y chromosome. (C) The distribution of heterozygosity rate in**  
 566 **a window size of 150 Kb along the Y chromosome among Eurasian pigs.**

567

568

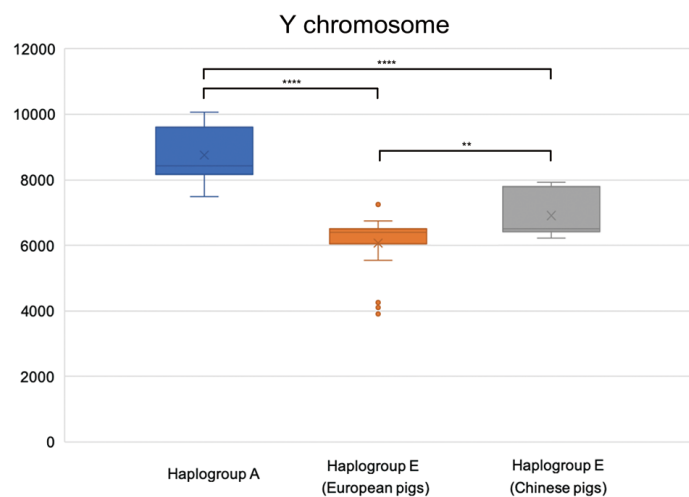

569

570 **Supplementary Figure S6. The comparison of heterozygous sites distribution on**  
 571 **the Y chromosome derived from 68,387 SNPs after removing SNPs same as the**  
 572 **SNPs called by the reads of female individuals misaligned to Y chromosome**  
 573 **reference sequence among Haplogroup A, Haplogroup E (European pigs) and**  
 574 **Haplogroup E (Chinese pigs).**

575

576

577

578

579

580

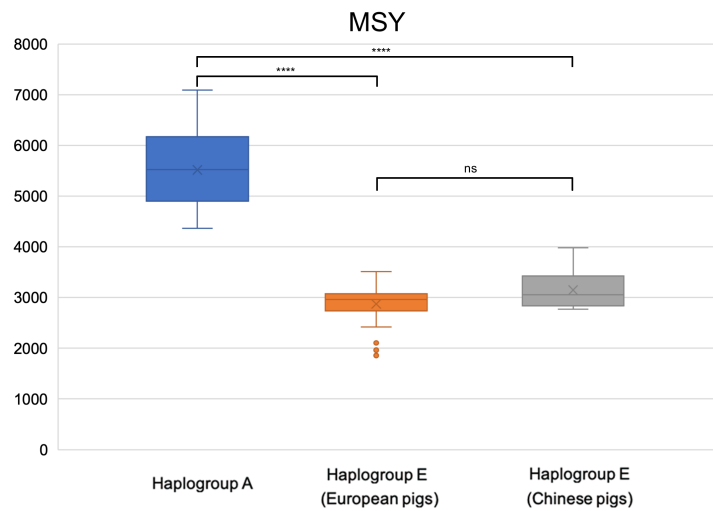

581

582 **Supplementary Figure S7. The comparison of heterozygous sites distribution on**  
 583 **the MSY among Haplogroup A, Haplogroup E (European pigs) and Haplogroup**  
 584 **E (Chinese pigs).**

585

586

587

588

589

590

591

592

593

594

595

596

597

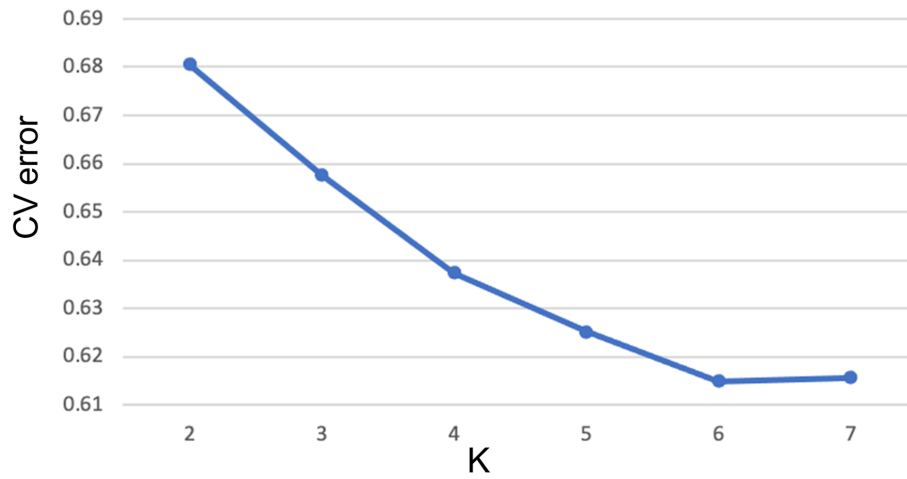

598

599 **Supplementary Figure S8.** The CV error for the ADMIXTURE analysis at K values  
600 ranging from 2 to 7.

601

602

603

604

605

606

607

608

609

610

611

612

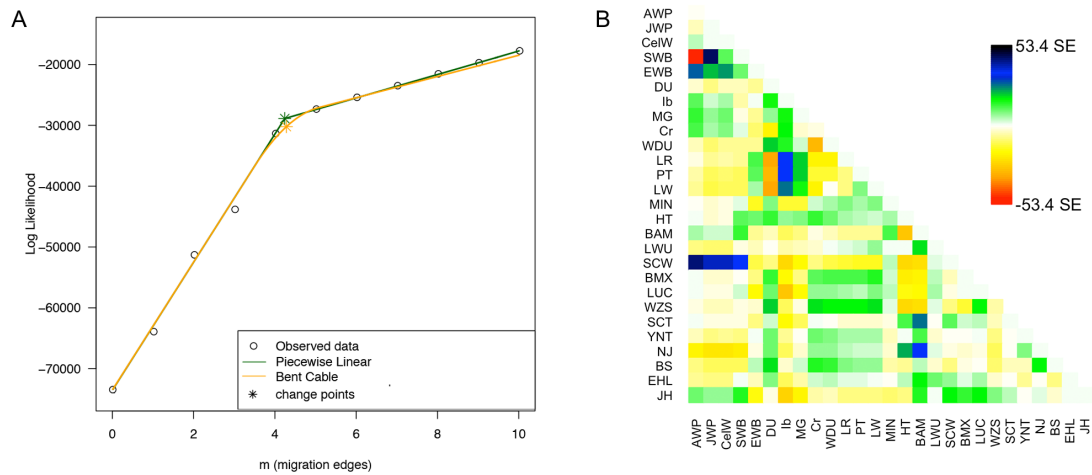

613

614 **Supplementary Figure S9. Determination of the migration edge number in the**

615 **TreeMix model and residual heatmap with 4 migration events. (A) Observed Log**

616 **likelihood values are plotted against the number of migration edges tested from 0 to 10,**

617 **and two models are fitted to the data. Both the piecewise and the Bent Cable fitting**

618 **delivered an optimal value of 4 for the number of migration edges (change points). (B)**

619 **Residual fit from the maximum likelihood tree with four migration edges. The**

620 **abbreviations EP, NCDP, ECDP, WCDP, SCDP, and CWB are as in Figure 1; Full**

621 **names of the pig breeds are detailed in Supplementary Table S1. B.**

622

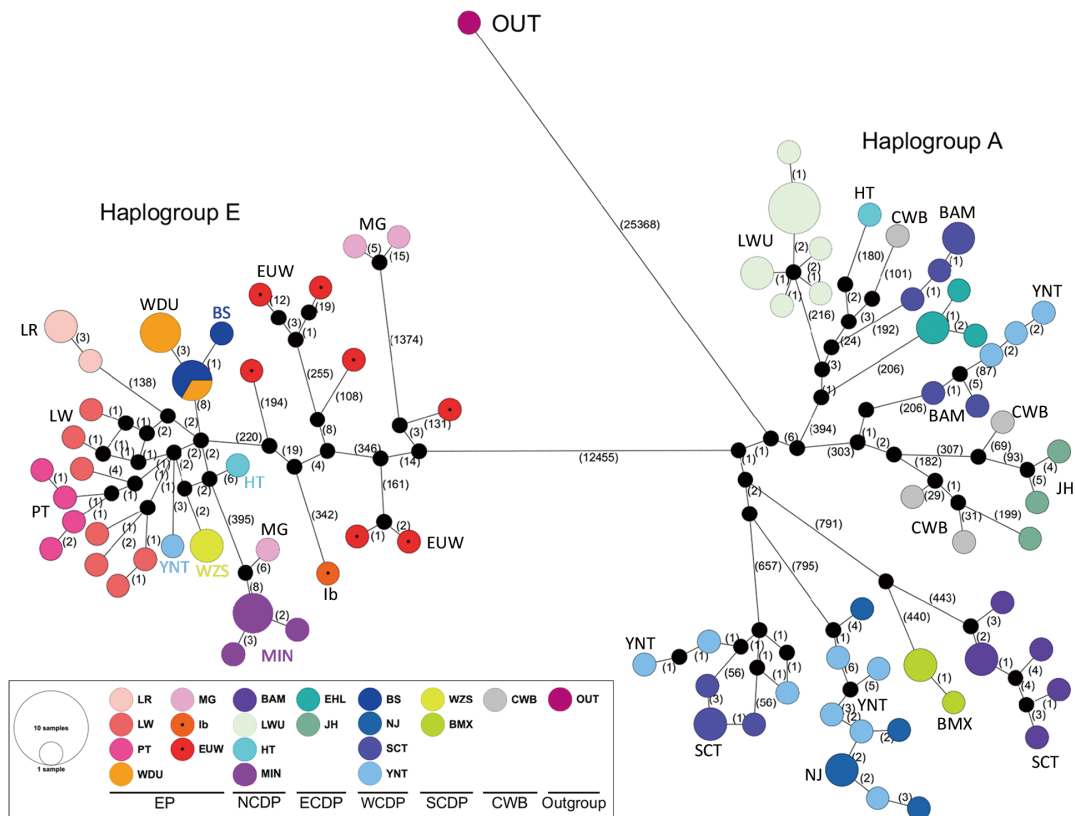

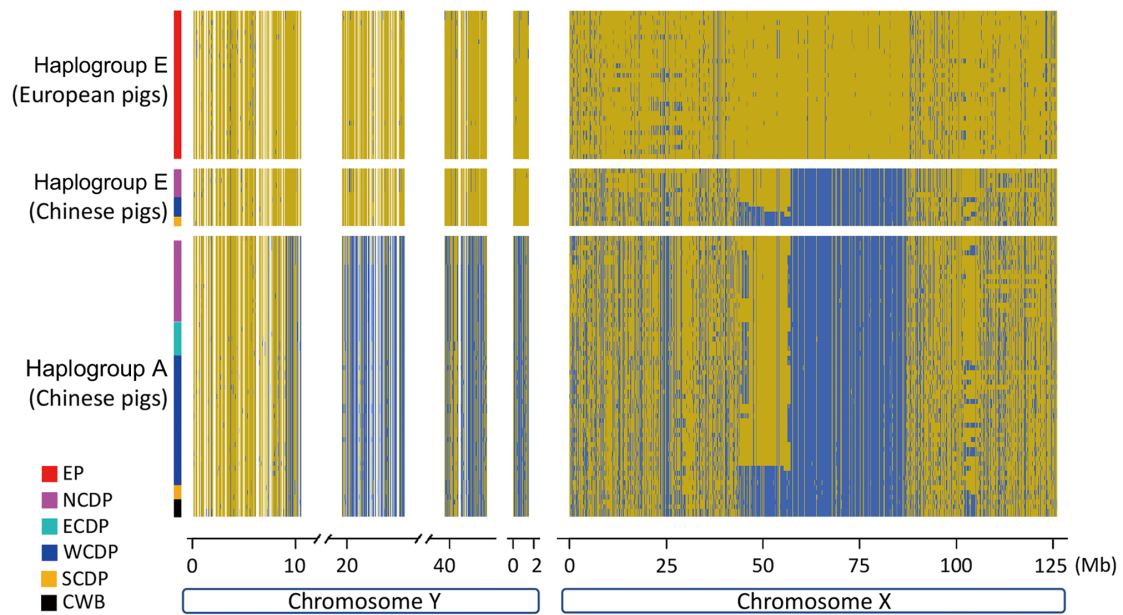

630

631 **Supplementary Figure S11. The different haplotype patterns between the Y**

632 **chromosome and the X chromosome in Eurasian pigs.** This plot includes all 101

633 Eurasian male pigs, which are divided into three groups: European pigs in MSY

634 Haplogroup E, Chinese pigs in MSY Haplogroup E and Chinese pigs in MSY

635 Haplogroup A. The haplotypes are constructed for each individual using all qualified

636 SNPs on Y and X chromosome. Alleles that are identical and different from the ones in

637 the Duroc reference genome are indicated by orange and blue, respectively. The

638 abbreviations EP, NCDP, ECDP, WCDP, SCDP and CWB are as in **Figure 1**.

639

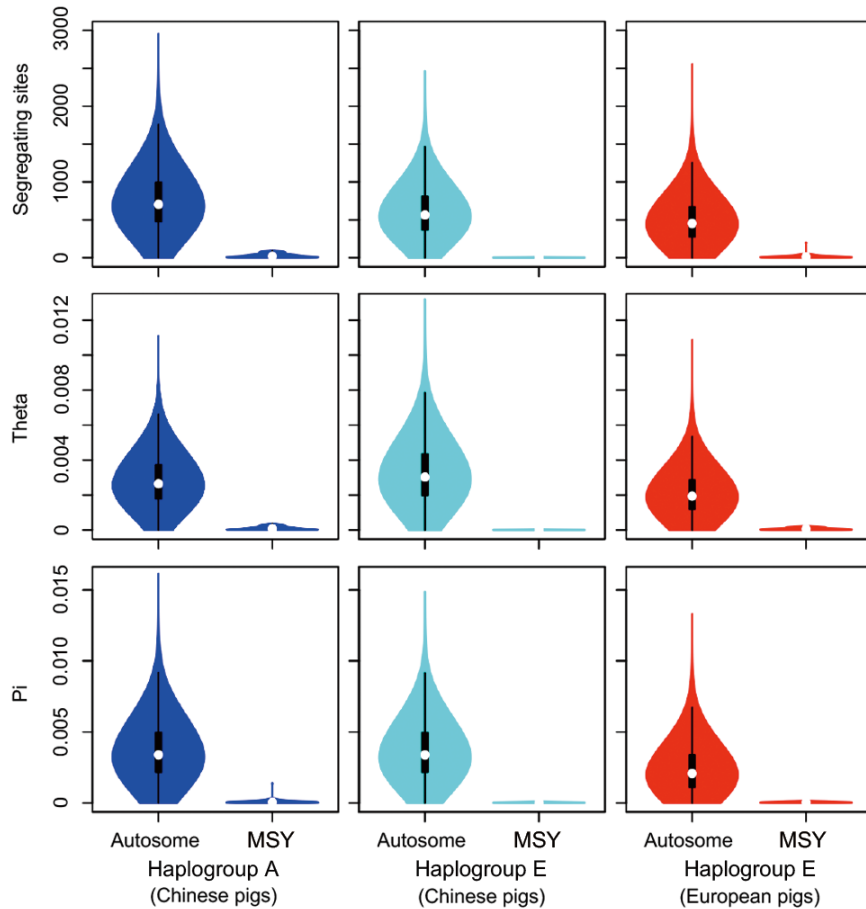

640

641 **Supplementary Figure S12. Comparison of nucleotide variability within the**  
 642 **proximal and distal regions of the Y chromosome and on autosomes.** There are two  
 643 different haplogroups on the proximal and distal regions of the Y chromosome (MSY)  
 644 in all tested Eurasian pigs. Haplogroup A consists of Chinese pigs with Asian-origin  
 645 MSY; Haplogroup E contains European pigs and some Chinese pigs with European-  
 646 origin MSY. Statistics of segregation sites, theta, Pi values were calculated in a window  
 647 size of 50 kb for European pigs in Haplogroup E, Chinese pigs in Haplogroup E, and  
 648 Chinese pigs in Haplogroup A, respectively. Pi, nucleotide diversity referred to Tajima's  
 649 Pi; theta, nucleotide diversity referred to Watterson's theta.

650

651

652

653

654



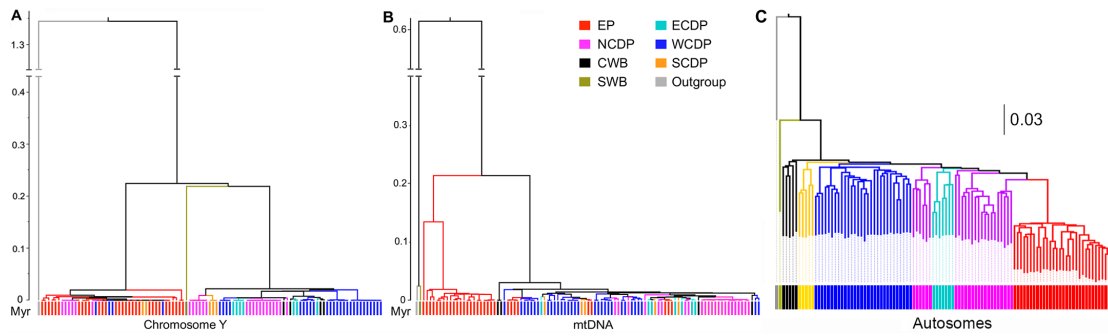

655  
 656  
 657  
 658  
 659  
 660  
 661  
 662  
 663  
 664  
 665  
 666  
 667  
 668  
 669  
 670

**Supplementary Figure S13. Different phylogenetic relationships of *Sus* revealed by Y chromosome, mtDNA and autosomes.** (A) Phylogenetic relationships among the 103 male Eurasian pigs constructed using the MSY sequence of the Build 11.1 Y chromosome. Inferred divergence time is shown on the Y-axis of the Bayesian tree. (B) Phylogenetic relationships among the 103 male Eurasian pigs constructed using the Build 11.1 chrM sequences via BEAST. Divergence time estimate of EUW (WB21M05) and CWB (CB11-2), 0.219 million years (Zhang et al. 2021), was used as softbound priors. (C) Neighbor-joining tree of these pigs based on autosomal data. The abbreviations EP, ECDP, NCDP, WCDP, CWB, SCDP and SWB are described in figure 1. *S. verrucosus* (Java warty pig) was set as the outgroup.

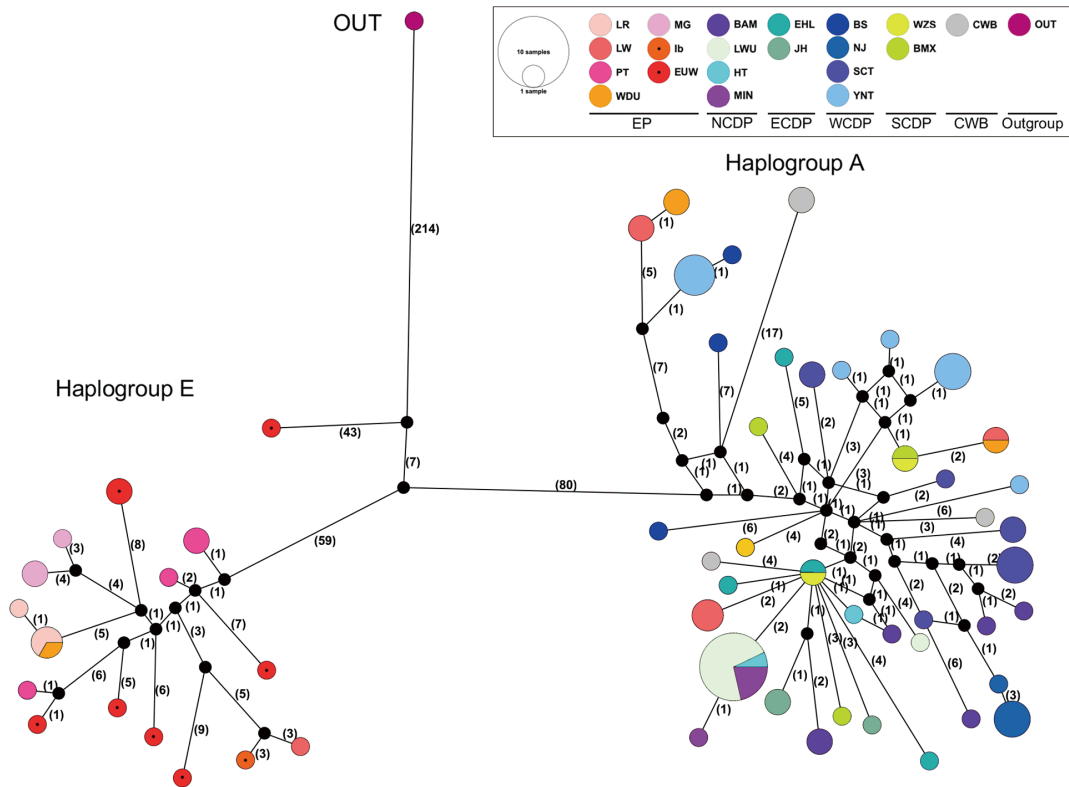

671

672 **Supplementary Figure S14. Median joining haplotype network of chrM sequences**

673 **(n = 102).** The circles represent different haplotypes with size proportional to the

674 number of individuals represented. Lines connect each haplotype to its most similar

675 relative and the number on the lines indicate mutation steps. **Haplogroup E here**

676 **includes chrM haplotypes present only in Europe and haplogroup A includes chrM**

677 **haplotypes fixed in Asia but present in some European breeds.** Colors correspond with

678 the different pig breeds. Full names of the pig breeds are detailed in **supplementary**

679 **table S1.**

680

681

682

683

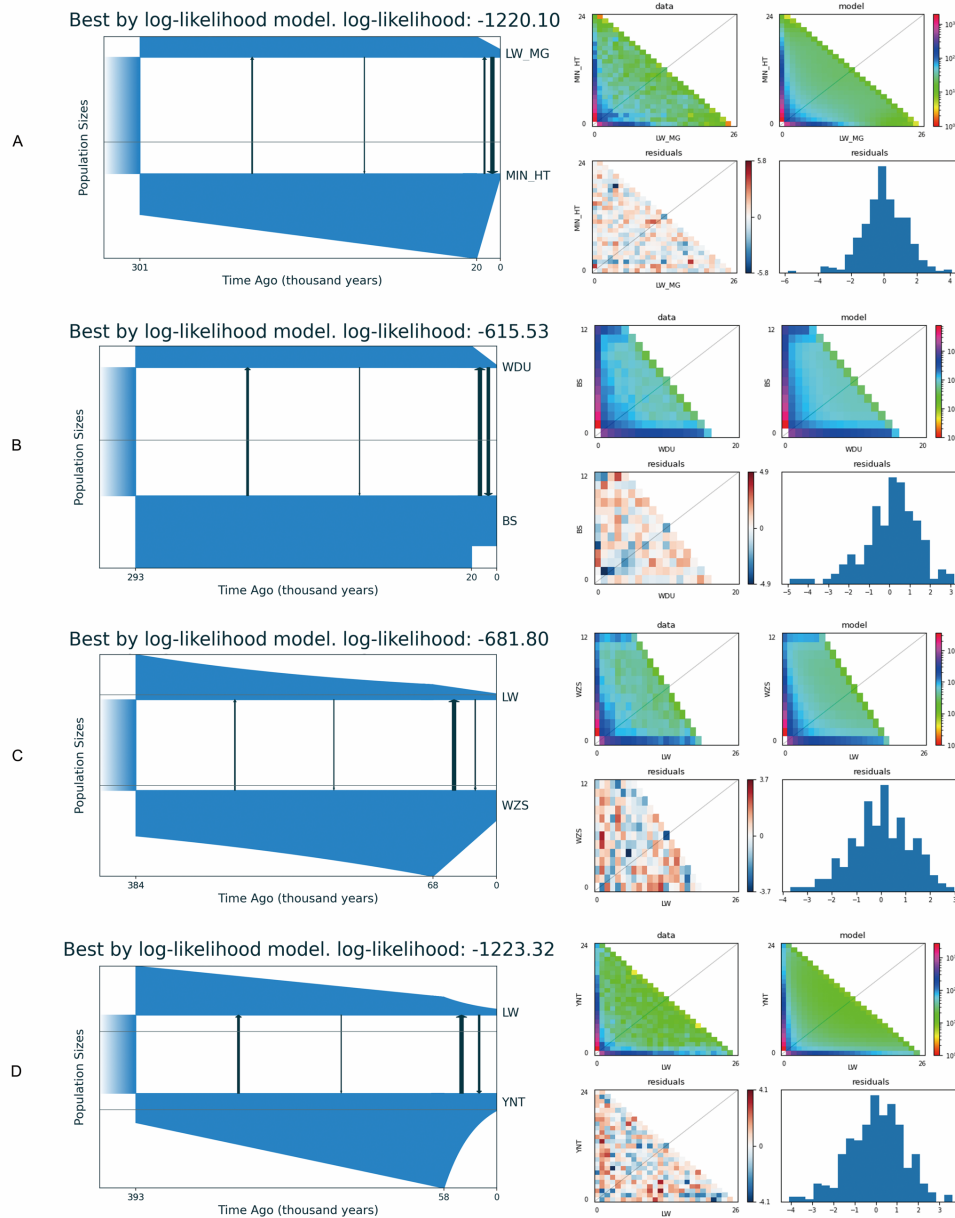

684

685 **Supplementary Figure S15. Comparisons of allele frequency spectra (AFS)**

686 **between the modelled and real data of four pairs of European and Chinese pig**

687 **populations using  $\partial a \partial i$ : (A) LW&MG and MIN&HT; (B)WDU and BS; (C) LW and**

688 **WZS; (D) LW and YNT. In every panel, there are five plots, which are: the best-fitted**

689 **demographic model; marginal AFS of the real data for each pair of populations; AFS**

690 **of the maximum-likelihood model simulation based on the real data; The residuals**

691 **between the modelled and real data are shown in heat maps and bar graphs.**

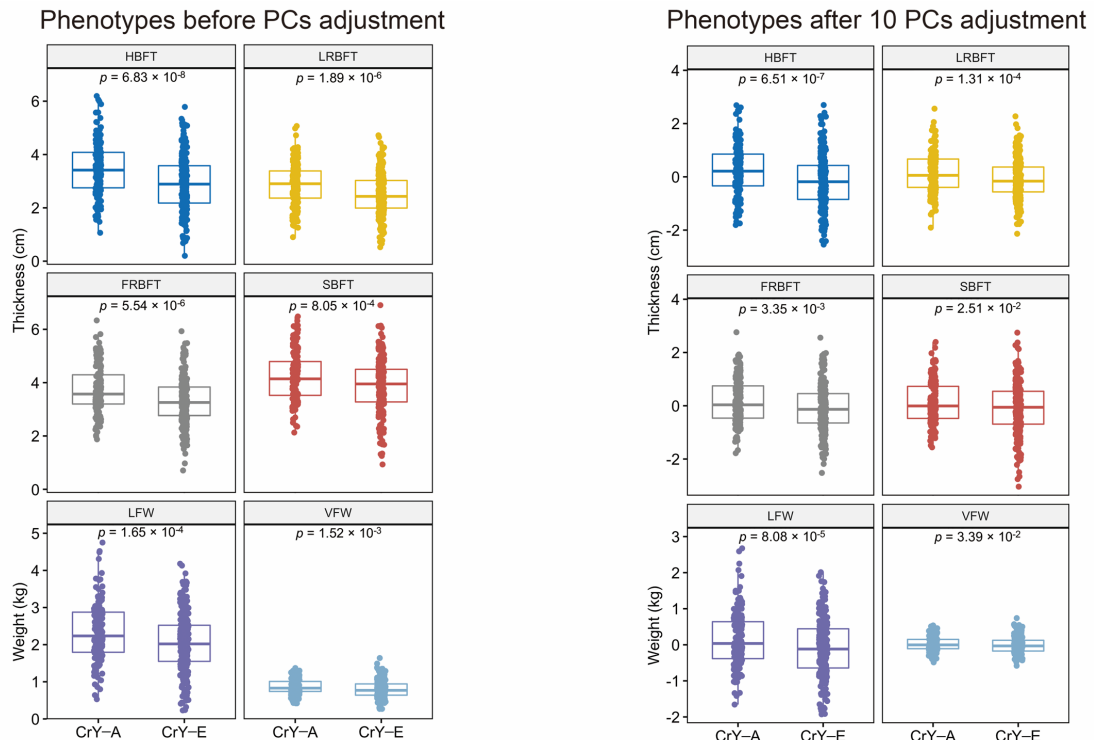

| #N | eigenvalue | difference | twstat | p-value    | effect. n |
|----|------------|------------|--------|------------|-----------|
| 1  | 11.1367    | NA         | 1.924  | 0.0118162  | 125.93    |
| 2  | 9.88512    | -1.25158   | 1.464  | 0.0246142  | 143.474   |
| 3  | 9.38544    | -0.49968   | 2.664  | 0.00322227 | 161.564   |
| 4  | 8.35373    | -1.03171   | 2.395  | 0.00524606 | 191.574   |
| 5  | 7.68496    | -0.66877   | 2.885  | 0.00212799 | 225.944   |
| 6  | 6.86444    | -0.82052   | 2.43   | 0.00492809 | 273.987   |
| 7  | 6.09358    | -0.77086   | 1.233  | 0.0348088  | 327.99    |
| 8  | 5.7178     | -0.37578   | 1.392  | 0.027443   | 376.408   |
| 9  | 5.26814    | -0.44966   | 0.784  | 0.0105222  | 438.039   |
| 10 | 4.99697    | -0.27117   | 1.001  | 0.0652097  | 500.879   |
| 11 | 4.81715    | -0.17982   | 1.993  | 0.0505362  | 582.871   |
| 12 | 4.35609    | -0.46106   | 0.328  | 0.115895   | 720.843   |
| 13 | 4.19474    | -0.16135   | 0.758  | 0.0674937  | 827.679   |
| 14 | 3.8763     | -0.31844   | -0.898 | 0.385593   | 981.569   |
| 15 | 3.76082    | -0.11548   | -0.734 | 0.338299   | 1079.798  |

692

693 **Supplementary Figure S16. Comparison of fatness traits between the male pigs**

694 **with Chinese chromosome Y and with European chromosome Y. (A) Phenotypes**

695 **before PCs adjustment. (B) the number of statistically significant principal components**

696 **using twstats method. (C) Phenotypes After PCs adjustment.**

697

698

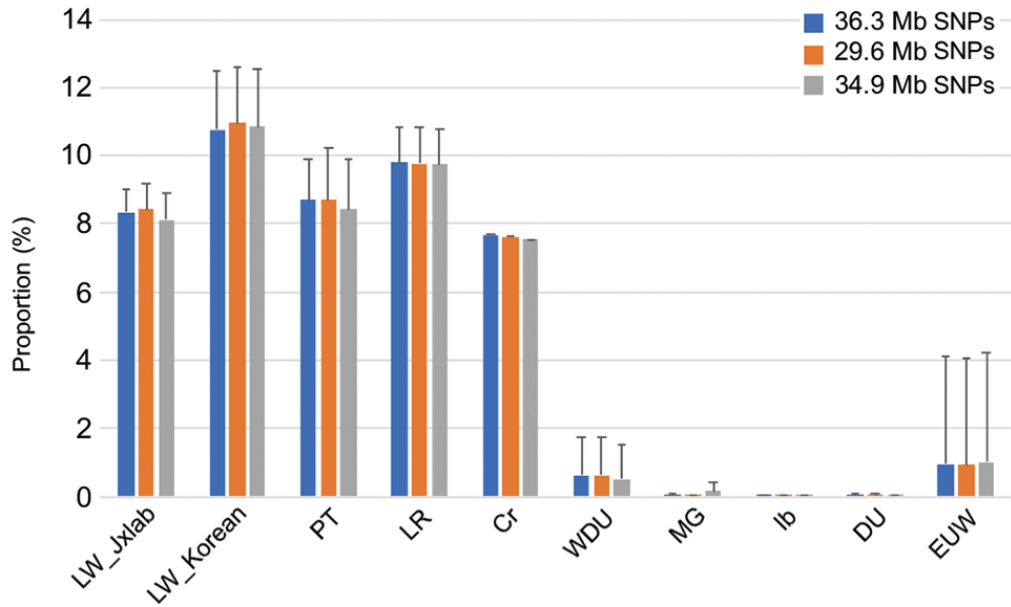

699

700 **Supplementary Figure S17. Estimated percentage of the Asian component of**

701 **European pigs from an unsupervised ADMIXTURE analysis with K = 2.** Blue bars

702 show the results of 36.3M SNPs used in our present study; red bars show the results of

703 29.6 M SNPs shared with Build 151 of the *Sus scrofa* dbSNP database; gray bars show

704 the results of 34.9M SNPs called using the variance of Build 151 of the *Sus scrofa*

705 dbSNP as known variants in the 200 Eurasian pigs. LW\_Jxlab, Large White our group

706 sequenced; LW\_Korean, Large White submitted by a Korean group; PT, Pietran; LR,

707 Landrace; Cr, Creole; WDU, White Duroc; MG, Mangalica; Ib, Iberian; DU, Duroc;

708 EUW, European wild boar. All the SNPs dataset were filtered with LD of  $r^2 = 0.4$ .

709

710

711

712

713

714

## 715 5. Supplementary References

- 716 Ai H, Fang X, Yang B, Huang Z, Chen H, Mao L, Zhang F, Zhang L, Cui L, He W, et al.  
717 2015. Adaptation and possible ancient interspecies introgression in pigs identified  
718 by whole-genome sequencing. *Nat. Genet.* 47(3):217-225.
- 719 Ai H, Huang L, Ren J. 2013. Genetic diversity, linkage disequilibrium and selection  
720 signatures in chinese and Western pigs revealed by genome-wide SNP markers.  
721 *PLoS ONE* 8(2):e56001.
- 722 Ai H, Yang B, Li J, Xie X, Chen H, Ren J. 2014. Population history and genomic  
723 signatures for high-altitude adaptation in Tibetan pigs. *BMC Genomics* 15834.
- 724 Alexander DH, Novembre J, Lange K. 2009. Fast model-based estimation of  
725 ancestry in unrelated individuals. *Genome Res.* 19(9):1655-1664.
- 726 Alfonso L. 2005. Sex ratio of offspring in pigs: farm variability and relationship  
727 with litter size and piglet birth weight. *Span. J. Agric. Res.* 3(3): 287-295.
- 728 Baskin L, Danell K. 2003. Ecology of Ungulates: A Handbook of Species in Eastern  
729 Europe and Northern and Central Asia. *Springer Science & Business Media*15–38.
- 730 Bianco E, Soto HW, Vargas L, Perez-Enciso M. 2015. The chimerical genome of Isla  
731 del Coco feral pigs (Costa Rica), an isolated population since 1793 but with  
732 remarkable levels of diversity. *Mol. Ecol.* 24(10):2364-2378.
- 733 Bosse M, Megens HJ, Madsen O, Frantz LA, Paudel Y, Crooijmans RP, Groenen MA.  
734 2014. Untangling the hybrid nature of modern pig genomes: a mosaic derived from  
735 biogeographically distinct and highly divergent *Sus scrofa* populations. *Mol. Ecol.*  
736 23(16):4089-4102.
- 737 Felsenstein J. 2005. PHYLIP (Phylogeny Inference Package) Version 3.6.  
738 Distributed by the author, Department of Genome Sciences, University of  
739 Washington, Seattle.
- 740 FernaNdez-Llario P, Carranza J, Mateos-Quesada P. 1999. Sex allocation in a  
741 polygynous mammal with large litters: the wild boar. *Anim. Behav.* 58(5):1079-  
742 1084.
- 743 Fitak RR. 2019. optM: an R package to optimize the number of migration edges  
744 using threshold models. *J. Hered.*
- 745 Frantz LA, Schraiber JG, Madsen O, Megens HJ, Bosse M, Paudel Y, Semiadi G,  
746 Meijaard E, Li N, Crooijmans RP. 2013. Genome sequencing reveals fine scale  
747 diversification and reticulation history during speciation in *Sus*. *Genome Biol.*

748 14(9):1719-1728.

749 Giuffra E, Kijas JM, Amarger V, Carlborg O, Jeon JT, Andersson L. 2000. The origin  
750 of the domestic pig: independent domestication and subsequent introgression.  
751 *Genetics* 154(4):1785-1791.

752 Groenen MA, Archibald AL, Uenishi H, Tuggle CK, Takeuchi Y, Rothschild MF, Rogel-  
753 Gaillard C, Park C, Milan D, Megens HJ, et al. 2012. Analyses of pig genomes provide  
754 insight into porcine demography and evolution. *Nature* 491(7424):393-398.

755 Guo W, Cao GH, Quan RC. 2017. Population dynamics and space use of wild boar in  
756 a tropical forest, Southwest China. *Global Ecology and Conservation* 11115-124.

757 Hutter S, Vilella AJ, Rozas J. 2006. Genome-wide DNA polymorphism analyses  
758 using VariScan. *BMC Bioinformatics* 7(1):1-10.

759 Ji J, Zhou L, Huang Y, Zheng M, Liu X, Zhang Y, Huang C, Peng S, Zeng Q, Zhong L.  
760 2018. A whole-genome sequence based association study on pork eating quality  
761 traits and cooking loss in a specially designed heterogeneous F6 pig population.  
762 *Meat Sci.* 146160-167.

763 Li H, Durbin R. 2009. Fast and accurate short read alignment with Burrows-  
764 Wheeler transform. *Bioinformatics* 25(14):1754-1760.

765 Marsan S, Mattioli A. 2013. *Il Cinghiale*75-76.

766 McKenna A, Hanna M, Banks E, Sivachenko A, Cibulskis K, Kernytsky A, Garimella  
767 K, Altshuler D, Gabriel S, Daly M, et al. 2010. The Genome Analysis Toolkit: a  
768 MapReduce framework for analyzing next-generation DNA sequencing data.  
769 *Genome Res.* 20(9):1297-1303.

770 McLaren DG. 1990. The potential of Chinese swine breeds to improve pork  
771 production efficiency in the US. *Urbana* 5161801.

772 Merta D, Bobek B, Albrycht M, Furtek J. 2015. The age structure and sex ratio in  
773 wild boar (*Sus scrofa*) populations as determined by observations of free-roaming  
774 populations and by harvests of collective hunts in southern Poland. *Eur. J. Wildl.*  
775 *Res.* 61(1):167-170.

776 Nishida S, Otsuka J, Yanagishi T, Sugaya T. 1977. Sex ratio of offspring in domestic  
777 animals. *The Japanese journal of animal reproduction* 23(2):55-59.

778 Patterson N, Moorjani P, Luo Y, Mallick S, Rohland N, Zhan Y, Genschoreck T,  
779 Webster T, Reich D. 2012. Ancient admixture in human history. *Genetics*  
780 192(3):1065-1093.

781 Phillips RW, Hsu TY. 1944. Chinese swine and their performance: compared with  
782 modern and crosses between Chinese and modern breeds. *J. Hered.* 35(12):365-  
783 379.

784 Pickrell JK, Pritchard JK. 2012. Inference of population splits and mixtures from  
785 genome-wide allele frequency data. *PLoS Genet.* 8(11):e1002967.

786 Posada D. 2008. jModelTest: phylogenetic model averaging. *Mol. Biol. Evol.*  
787 25(7):1253-1256.

788 Price AL, Patterson NJ, Plenge RM, Weinblatt ME, Shadick NA, Reich D. 2006.  
789 Principal components analysis corrects for stratification in genome-wide  
790 association studies. *Nat. Genet.* 38(8):904-909.

791 Quinlan AR, Hall IM. 2010. BEDTools: a flexible suite of utilities for comparing  
792 genomic features. *Bioinformatics* 26(6):841-842.

793 Rimmer A, Phan H, Mathieson I, Iqbal Z, Twigg SR, Consortium WGS, Wilkie AO,  
794 McVean G, Lunter G. 2014. Integrating mapping-, assembly- and haplotype-based  
795 approaches for calling variants in clinical sequencing applications. *Nat. Genet.*  
796 46(8):912-918.

797 Ronquist F, Huelsenbeck JP. 2003. MrBayes 3: Bayesian phylogenetic inference  
798 under mixed models. *Bioinformatics* 19(12):1572-1574.

799 Safranski TJ. 2008. Genetic selection of boars. *Theriogenology* 70(8):1310-1316.

800 Sanderson MJ. 2002. Estimating absolute rates of molecular evolution and  
801 divergence times: a penalized likelihood approach. *Mol. Biol. Evol.* 19(1):101-109.

802 Skinner BM, Sargent CA, Churcher C, Hunt T, Herrero J, Loveland JE, Dunn M,  
803 Louzada S, Fu B, Chow W, et al. 2016. The pig X and Y Chromosomes: structure,  
804 sequence, and evolution. *Genome Res.* 26(1):130-139.

805 Taylor, Roese. 2006. *Basic Pig Husbandry - The Boar, The Pig Site*1-12.

806 White S. 2011. From globalized pig breeds to capitalist pigs: a study in animal  
807 cultures and evolutionary history. *Environmental History* 16(1):94-120.

808 Zhang Y, Sun Y, Wu Z, Xiong X, Zhang J, Ma J, Xiao S, Huang L, Yang B. 2021.  
809 Subcutaneous and intramuscular fat transcriptomes show large differences in  
810 network organization and associations with adipose traits in pigs. *Science China*  
811 *Life Sciences*1-15.

812 Zhu Y, Li W, Yang B, Zhang Z, Ai H, Ren J, Huang L. 2017. Signatures of selection and  
813 interspecies introgression in the genome of Chinese domestic pigs. *Genome Biol.*



814 *Evol.* 9(10):2592-2603.  
815
